# Supplementary material for: Synthesis of N,O-Chelating Hydrazidopalladium Complexes from 1,2-Bis(trifluoroacetyl)hydrazine
Source: MDPI journal article supplement (doi:10.3390/inorganics9100076), 2021-10-07
Supplement: s1 [file s1]

# Supplementary Materials

## Synthesis of *N,O*-Chelating Hydrazidopalladium Complexes from 1,2-Bis(trifluoroacetyl)hydrazine

Yoshihito Kayaki,\* Tomohiro Hayakawa, and Takao Ikariya

Department of Chemical Science and Engineering, School of Materials and Chemical Technology, Tokyo Institute of Technology, 2-12-1-E4-1 O-okayama, Meguro-ku Tokyo 152-8552, Japan

\*E-mail: ykayaki@o.cc.titech.ac.jp

### Contents

|                                                       | Page |
|-------------------------------------------------------|------|
| X-ray Crystallographic Data for <b>2</b> and <b>3</b> | S2   |
| Copies of NMR Spectra of <b>2–4</b>                   | S3   |

## X-ray Crystallographic Data for 2 and 3

**Table S1.** Crystallographic data for 2 and 3

|                                            | 2                                                                                              | 3                                                                                                          |
|--------------------------------------------|------------------------------------------------------------------------------------------------|------------------------------------------------------------------------------------------------------------|
| Empirical Formula                          | C <sub>31</sub> H <sub>26</sub> F <sub>6</sub> N <sub>2</sub> O <sub>2</sub> P <sub>2</sub> Pd | C <sub>10</sub> H <sub>16</sub> F <sub>6</sub> N <sub>4</sub> O <sub>2</sub> Pd                            |
| Formula Weight                             | 740.90                                                                                         | 444.65                                                                                                     |
| Crystal Color, Habit                       | yellow, prism                                                                                  | orange, prism                                                                                              |
| Crystal System                             | orthorhombic                                                                                   | monoclinic                                                                                                 |
| Space Group                                | <i>Pbca</i> (#61)                                                                              | <i>P2<sub>1</sub>/n</i> (#14)                                                                              |
| Lattice Parameters                         | <i>a</i> = 14.952(6) Å<br><i>b</i> = 18.858(8) Å<br><i>c</i> = 20.029(9) Å                     | <i>a</i> = 13.0204(19) Å<br><i>b</i> = 8.1491 (10) Å<br><i>c</i> = 15.1590(19) Å<br><i>β</i> = 91.198(8) ° |
| <i>Z</i> value                             | 8                                                                                              | 4                                                                                                          |
| <i>D</i> <sub>calc</sub>                   | 1.584 g/cm <sup>3</sup>                                                                        | 1.836 g/cm <sup>3</sup>                                                                                    |
| <i>F</i> <sub>000</sub>                    | 2976.00                                                                                        | 880.00                                                                                                     |
| μ(MoKα)                                    | 7.687 cm <sup>-1</sup>                                                                         | 12.289 cm <sup>-1</sup>                                                                                    |
| Exposure Rate                              | 8.0 sec./°                                                                                     | 4.0 sec./°                                                                                                 |
| No. of Reflections Measured                | 46879                                                                                          | 12071                                                                                                      |
| No. of Unique Reflections                  | 7096                                                                                           | 3647                                                                                                       |
| No. Variables                              | 397                                                                                            | 208                                                                                                        |
| <i>R</i> 1 ( <i>I</i> > 2.00σ( <i>I</i> )) | 0.0742                                                                                         | 0.0417                                                                                                     |
| w <i>R</i> 2 (All Reflections)             | 0.1593                                                                                         | 0.1130                                                                                                     |
| GOF on <i>F</i> <sup>2</sup>               | 1.368                                                                                          | 1.146                                                                                                      |

$$R1 = \sum ||F_o| - |F_c|| / \sum |F_o|, wR2 = [ \sum ( w (F_o^2 - F_c^2)^2 ) / \sum w(F_o^2)^2 ]^{1/2}.$$



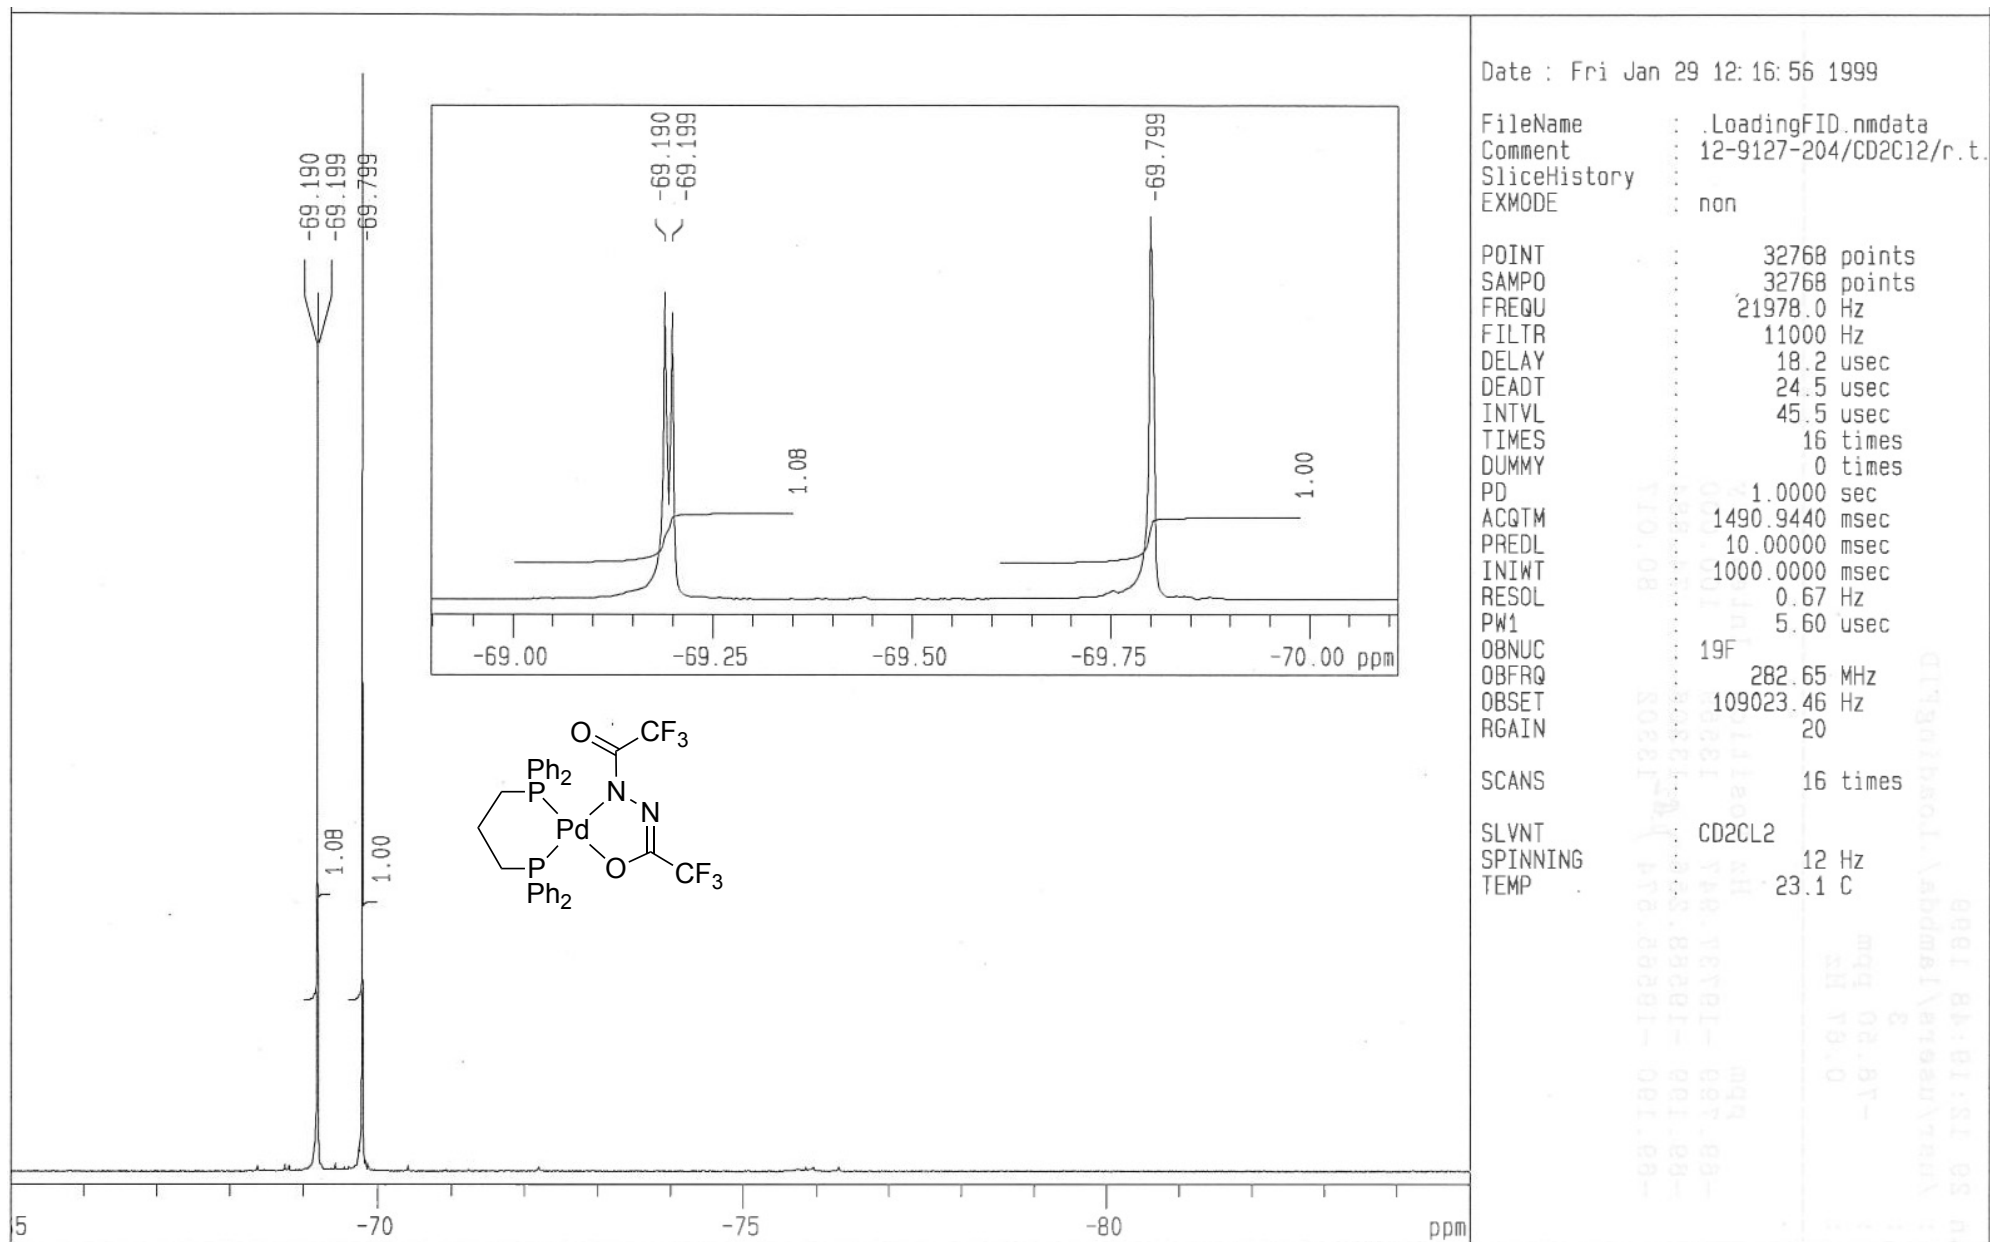

Figure S2. <sup>19</sup>F NMR Spectrum of **2** (CD<sub>2</sub>Cl<sub>2</sub>, rt)



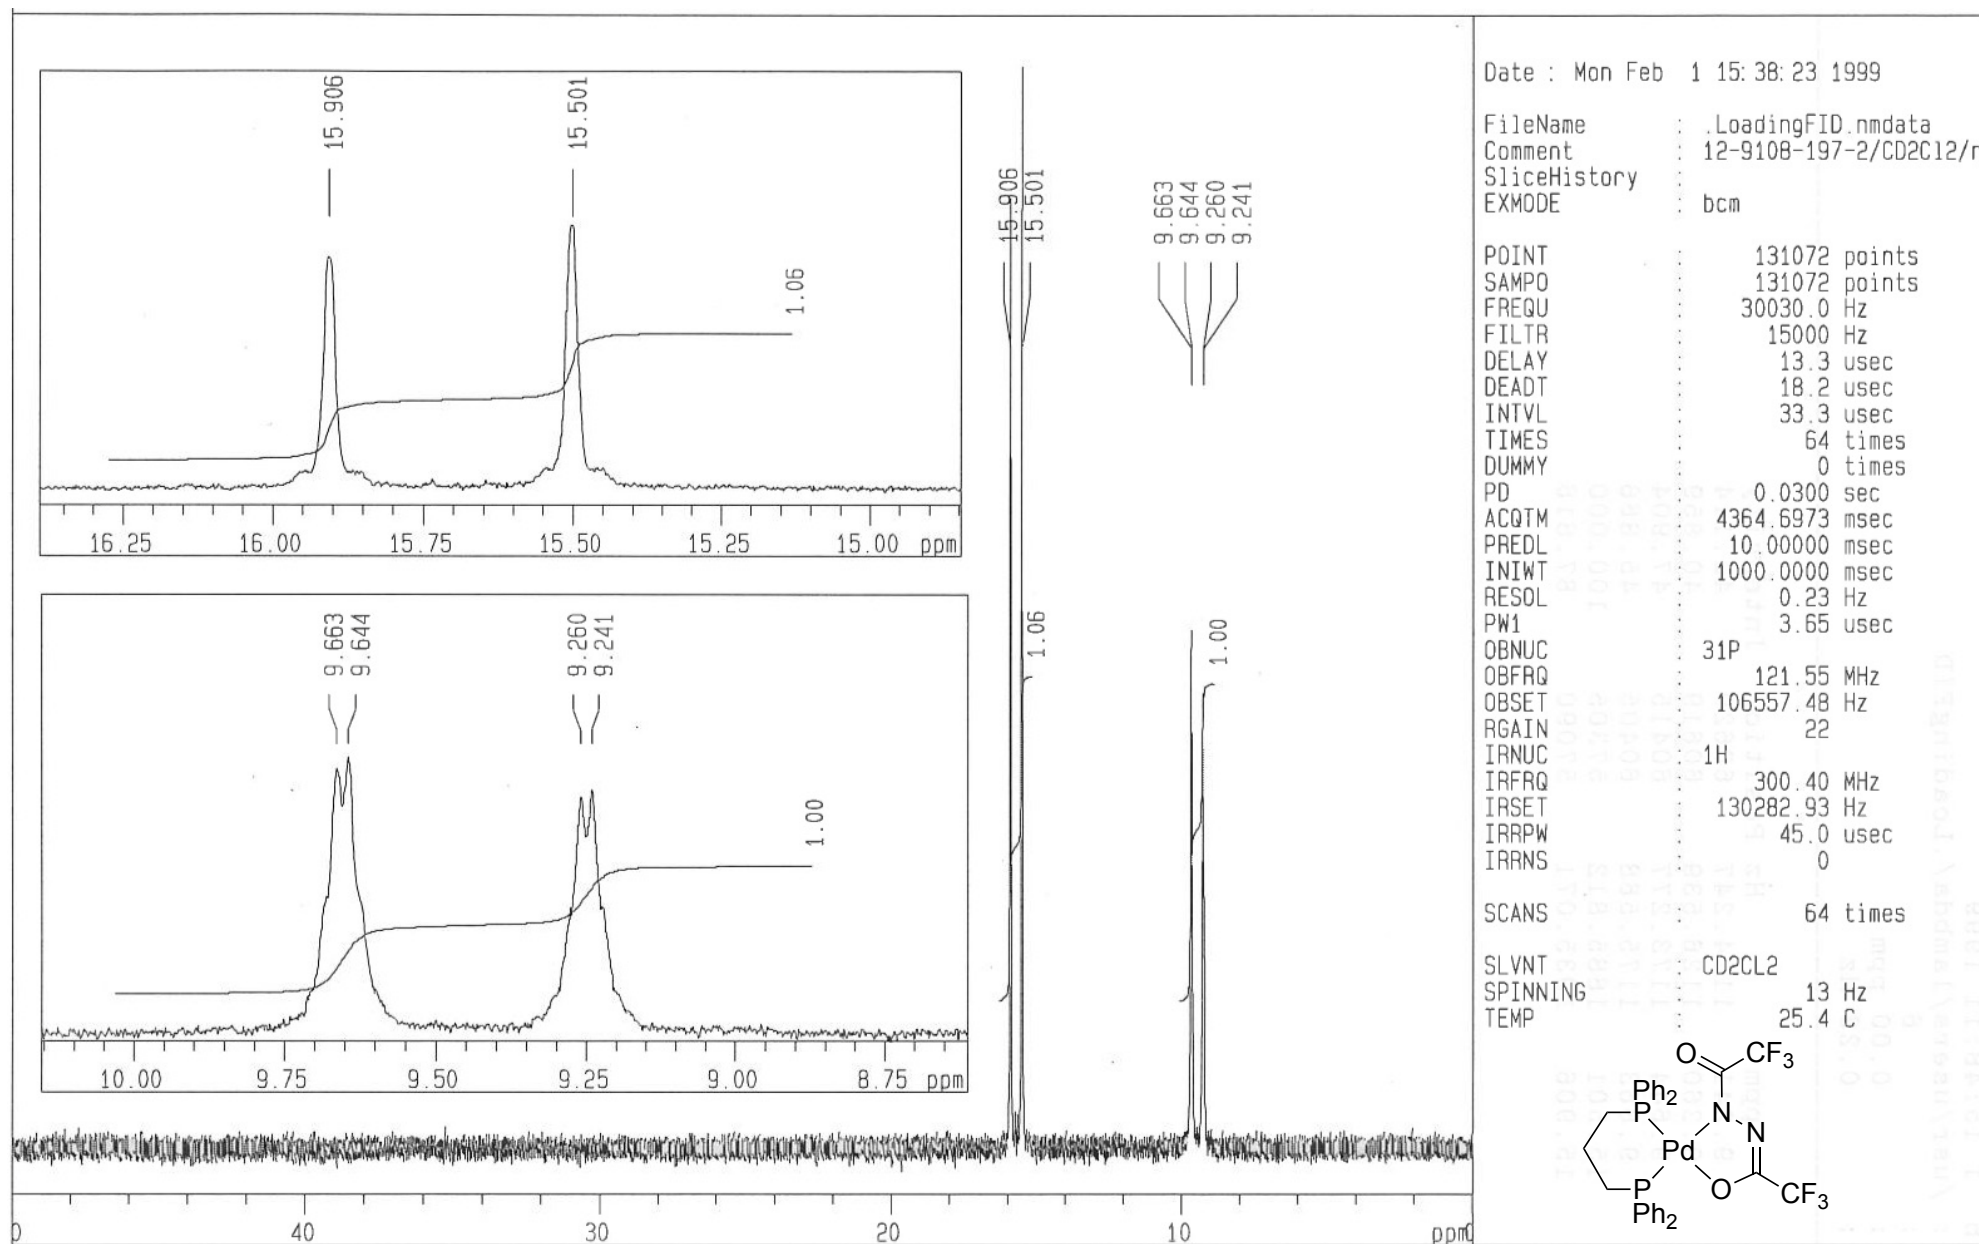

Figure S3.  $^{31}\text{P}\{^1\text{H}\}$  NMR Spectrum of **2** ( $\text{CD}_2\text{Cl}_2$ , rt)

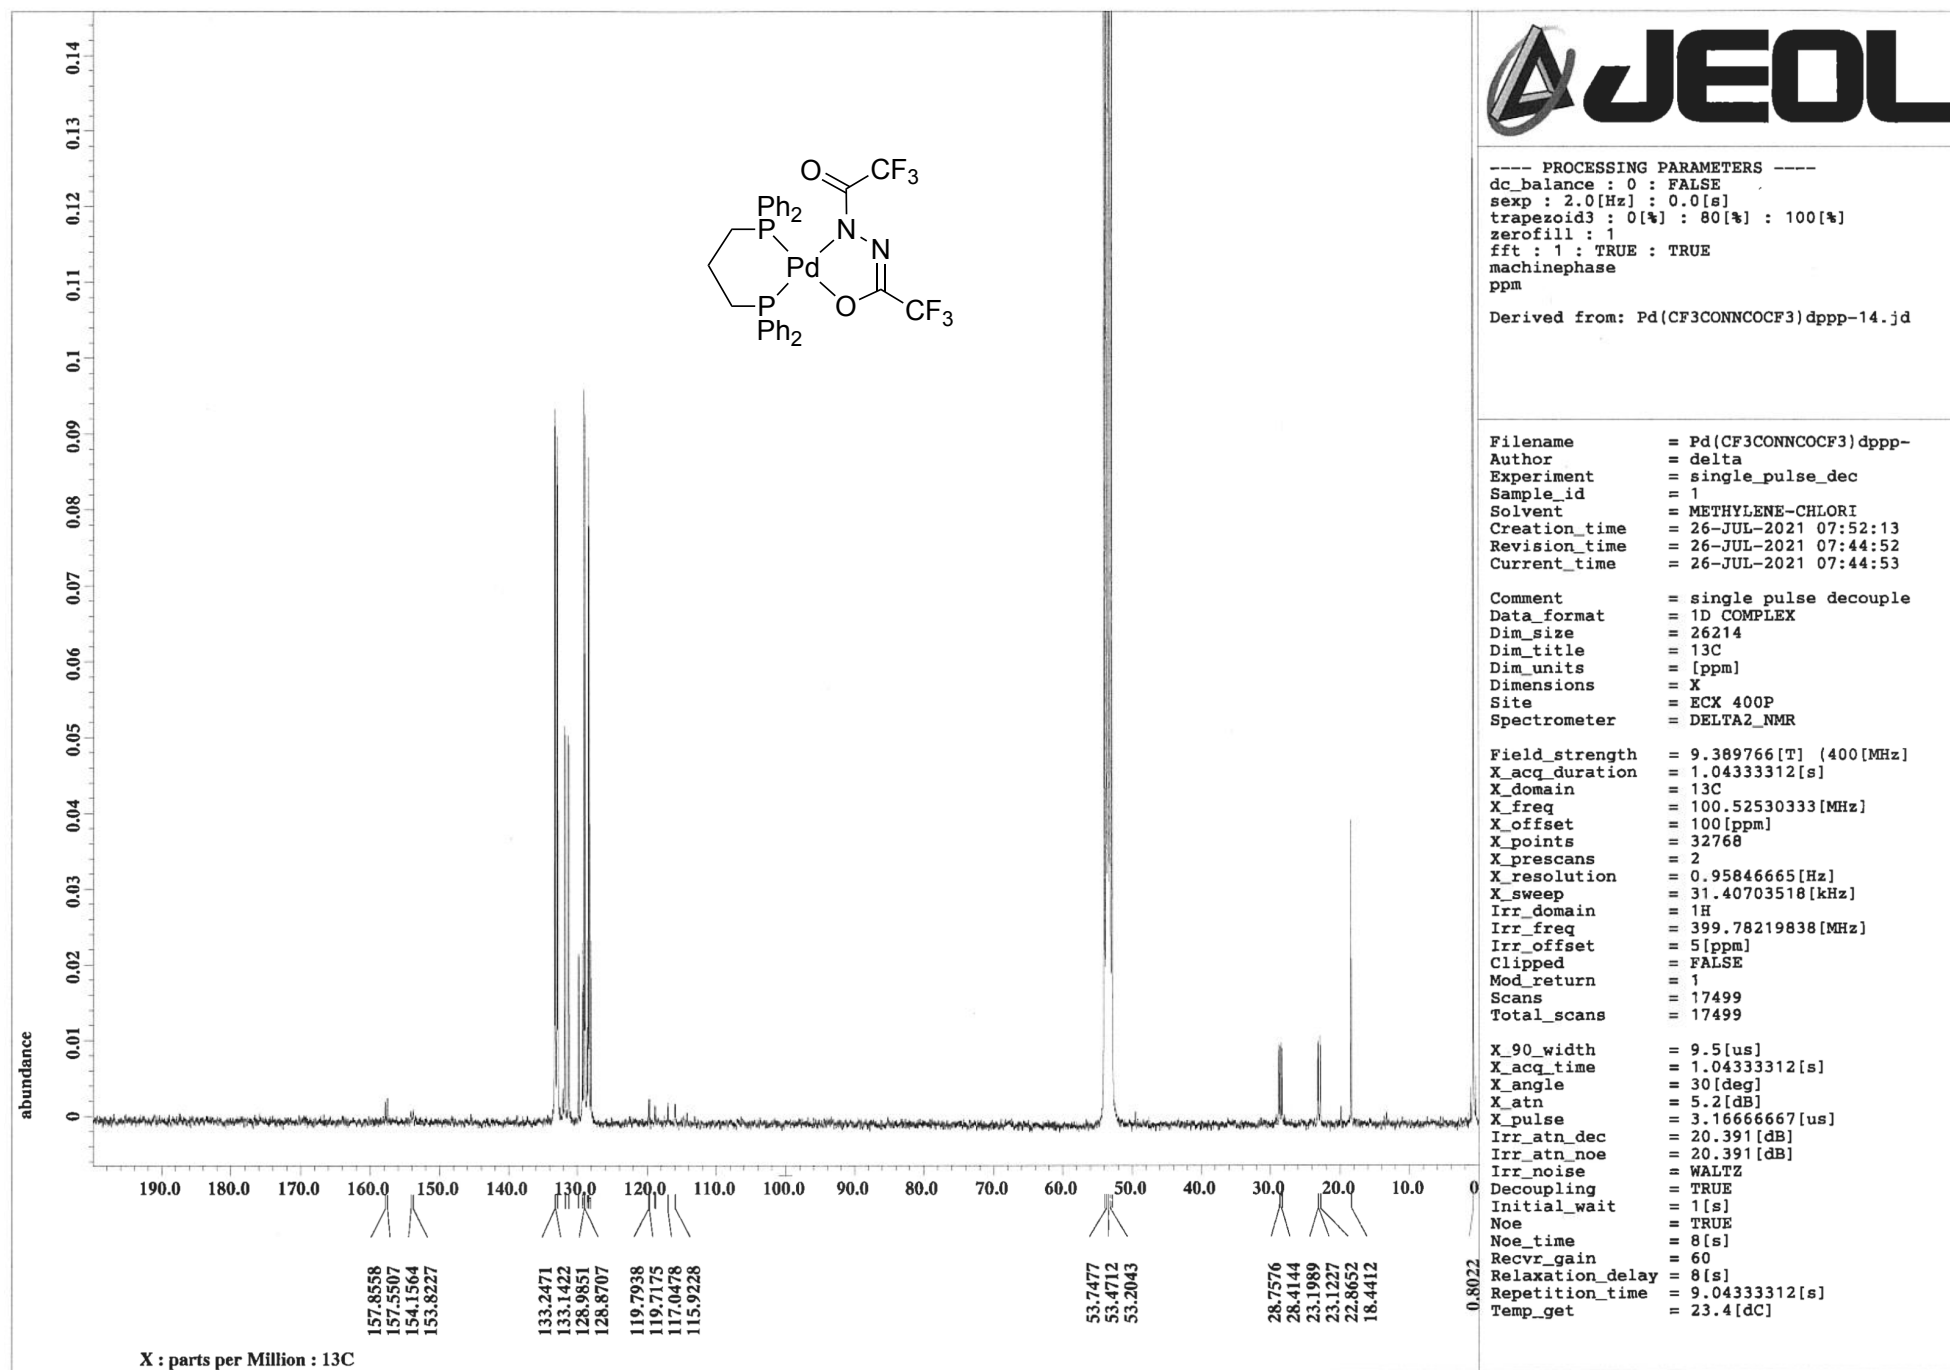

Figure S4.  $^{13}\text{C}\{^1\text{H}\}$  NMR Spectrum of **2** ( $\text{CD}_2\text{Cl}_2$ , rt)

----- PROCESSING PARAMETERS -----  
 dc\_balance : 0 : FALSE  
 sexp : 0.2[Hz] : 0.0[s]  
 trapezoid3 : 0[%] : 80[%] : 100[%]  
 zerofill : 1  
 fft : 1 : TRUE : TRUE  
 machinephase  
 ppm

Derived from: Pd(CF3CONNCOCF3)(tmeda)-5.

Filename = Pd(CF3CONNCOCF3)(tmeda)  
 Author = delta  
 Experiment = single\_pulse.ex2  
 Sample\_id = 1  
 Solvent = METHYLENE-CHLORIDE  
 Creation\_time = 14-MAY-2021 11:56:01  
 Revision\_time = 14-MAY-2021 11:44:29  
 Current\_time = 14-MAY-2021 11:44:52

Comment = single\_pulse  
 Data\_format = 1D COMPLEX  
 Dim\_size = 26214  
 Dim\_title = 1H  
 Dim\_units = [ppm]  
 Dimensions = X  
 Site = ECX 400P  
 Spectrometer = DELTA2\_NMR

Field\_strength = 9.389766[T] (400[MHz])  
 X\_acq\_duration = 3.2768[s]  
 X\_domain = 1H  
 X\_freq = 399.78219838[MHz]  
 X\_offset = 5[ppm]  
 X\_points = 32768  
 X\_prescans = 0  
 X\_resolution = 0.30517578[Hz]  
 X\_sweep = 10[kHz]  
 Irr\_domain = 1H  
 Irr\_freq = 399.78219838[MHz]  
 Irr\_offset = 5[ppm]  
 Tri\_domain = 1H  
 Tri\_freq = 399.78219838[MHz]  
 Tri\_offset = 5[ppm]  
 Clipped = FALSE  
 Mod\_return = 1  
 Scans = 16  
 Total\_scans = 16

X\_90\_width = 14[us]  
 X\_acq\_time = 3.2768[s]  
 X\_angle = 45[deg]  
 X\_atn = 2.1[dB]  
 X\_pulse = 7[us]  
 Irr\_mode = Off  
 Tri\_mode = Off  
 Dante\_presat = FALSE  
 Initial\_wait = 1[s]  
 Recvr\_gain = 44  
 Relaxation\_delay = 2[s]  
 Repetition\_time = 5.2768[s]  
 Temp\_get = 23.5[dC]

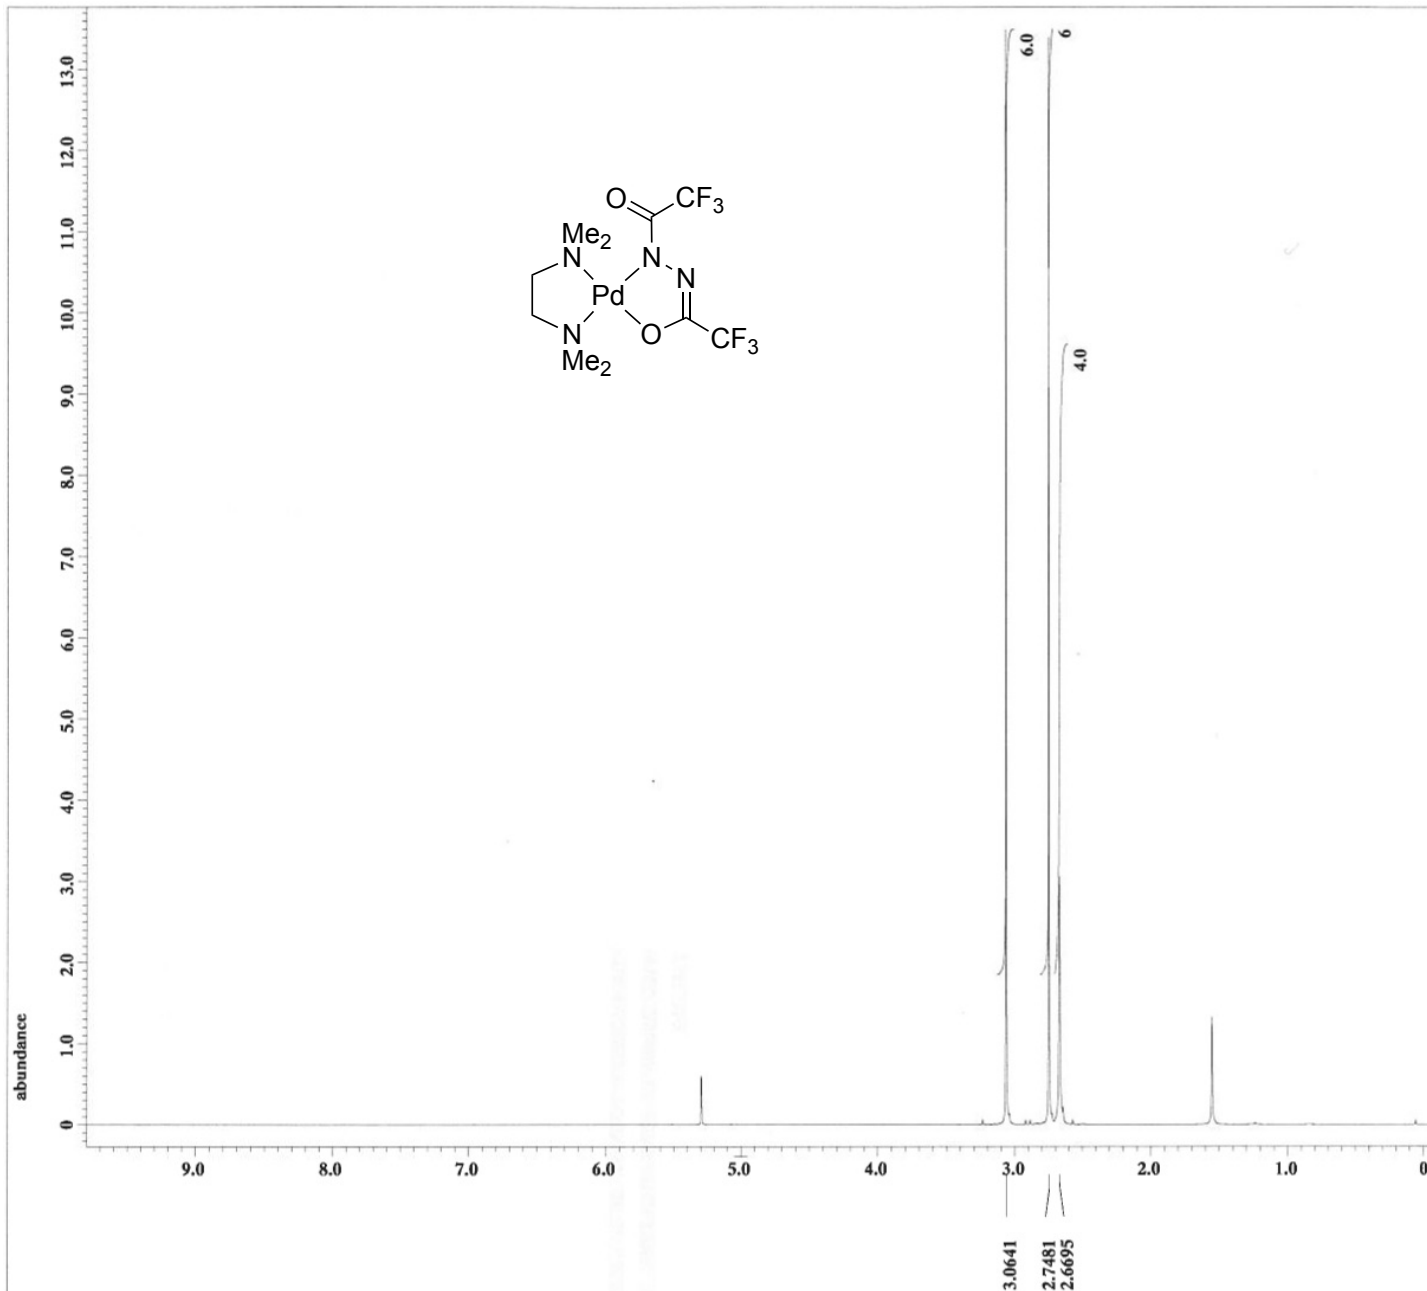

X : parts per Million : 1H

Figure S5. <sup>1</sup>H NMR Spectrum of **3** (CD<sub>2</sub>Cl<sub>2</sub>, rt)

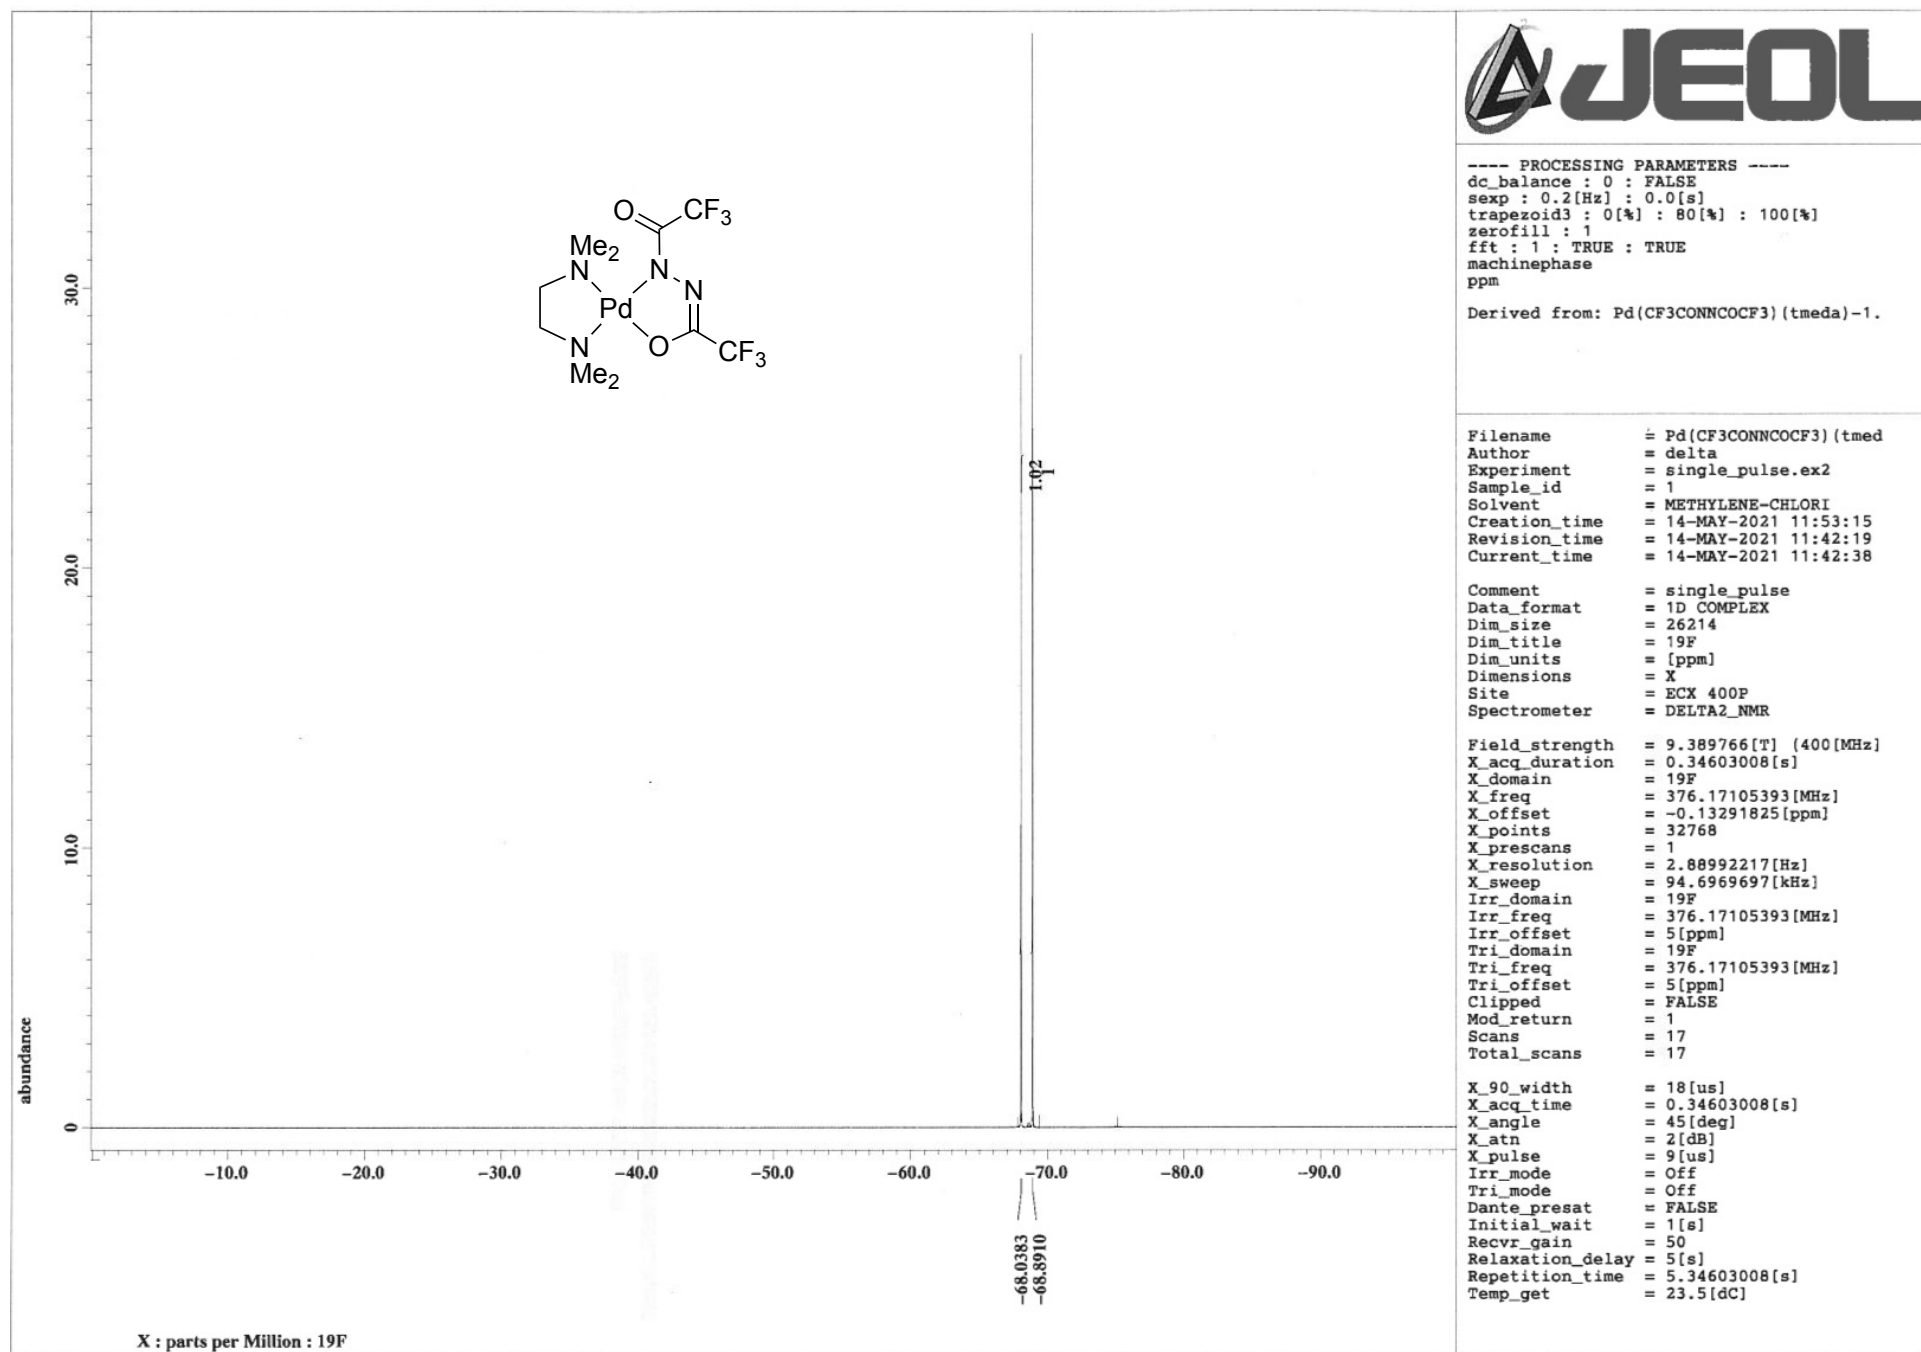

Figure S6. <sup>19</sup>F NMR Spectrum of **3** (CD<sub>2</sub>Cl<sub>2</sub>, rt)

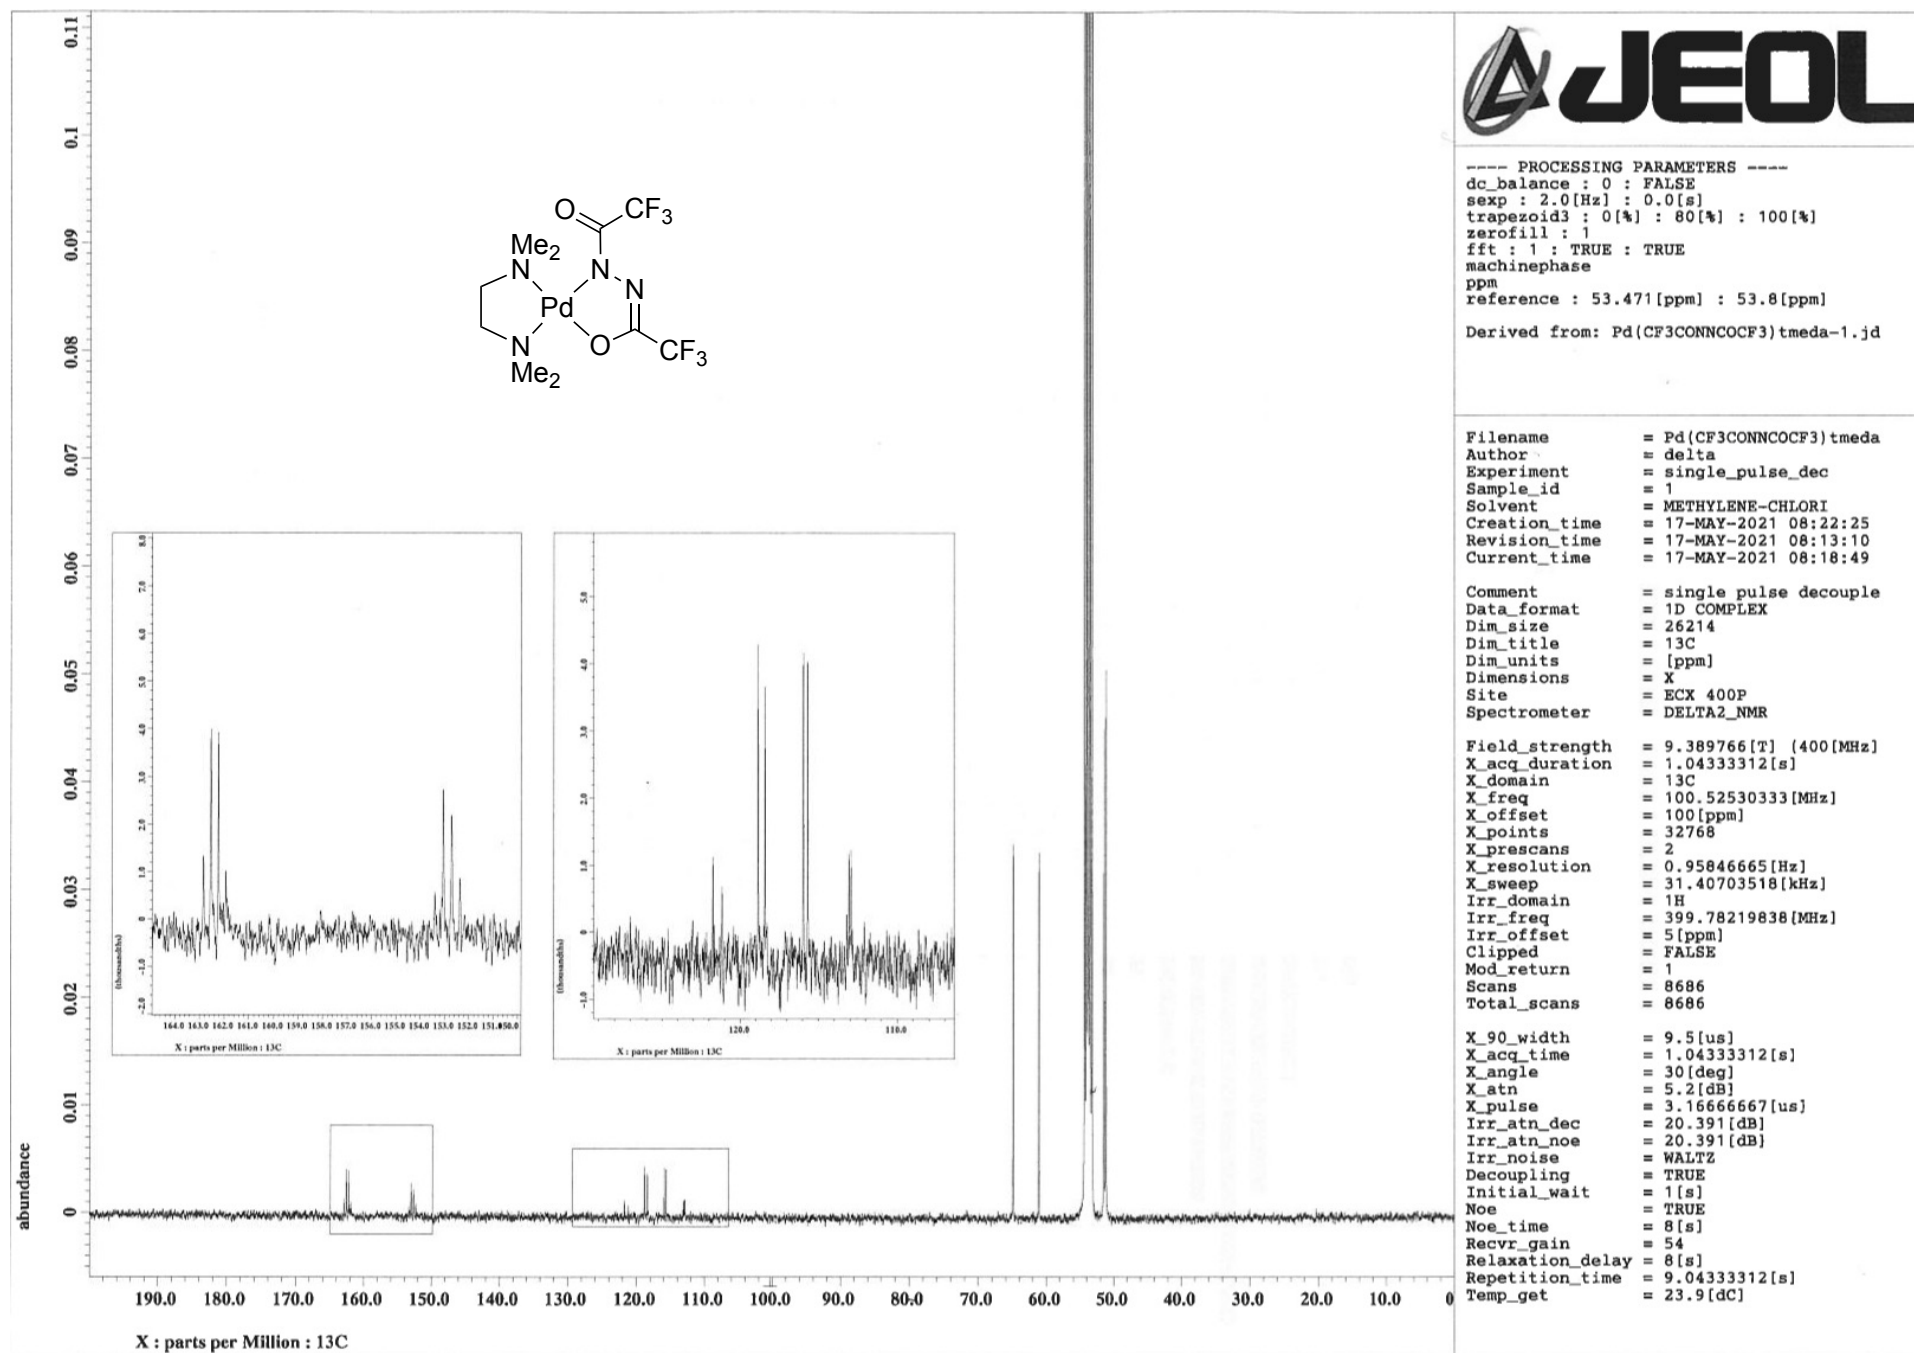

Figure S7.  $^{13}\text{C}\{^1\text{H}\}$  NMR Spectrum of **3** ( $\text{CD}_2\text{Cl}_2$ , rt)



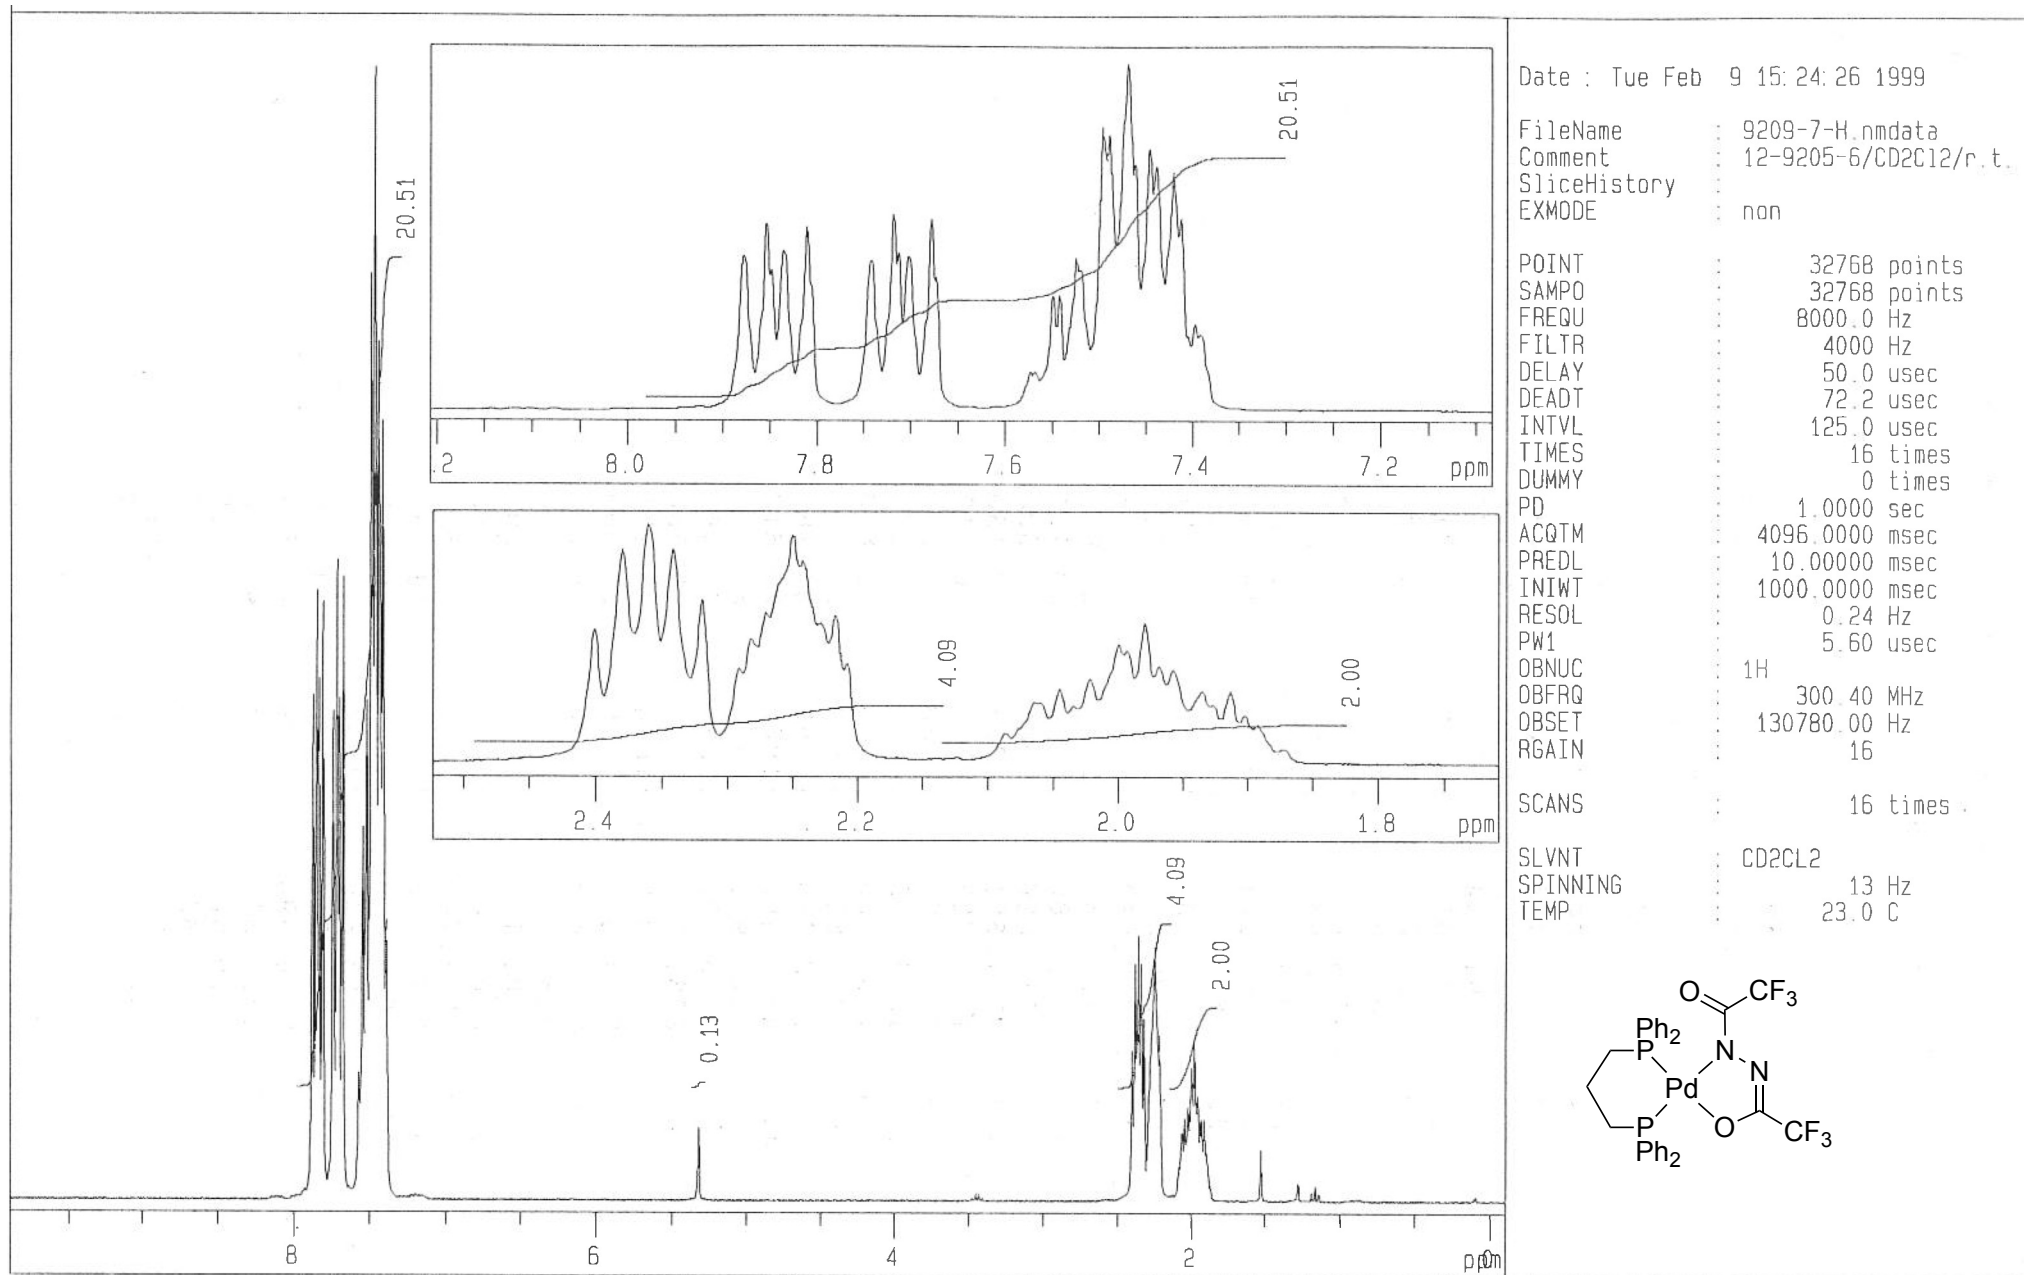

Figure S8.  $^1\text{H}$  NMR Spectrum of **2** Prepared from  $\text{Pd}(\text{OAc})_2$  ( $\text{CD}_2\text{Cl}_2$ , rt)

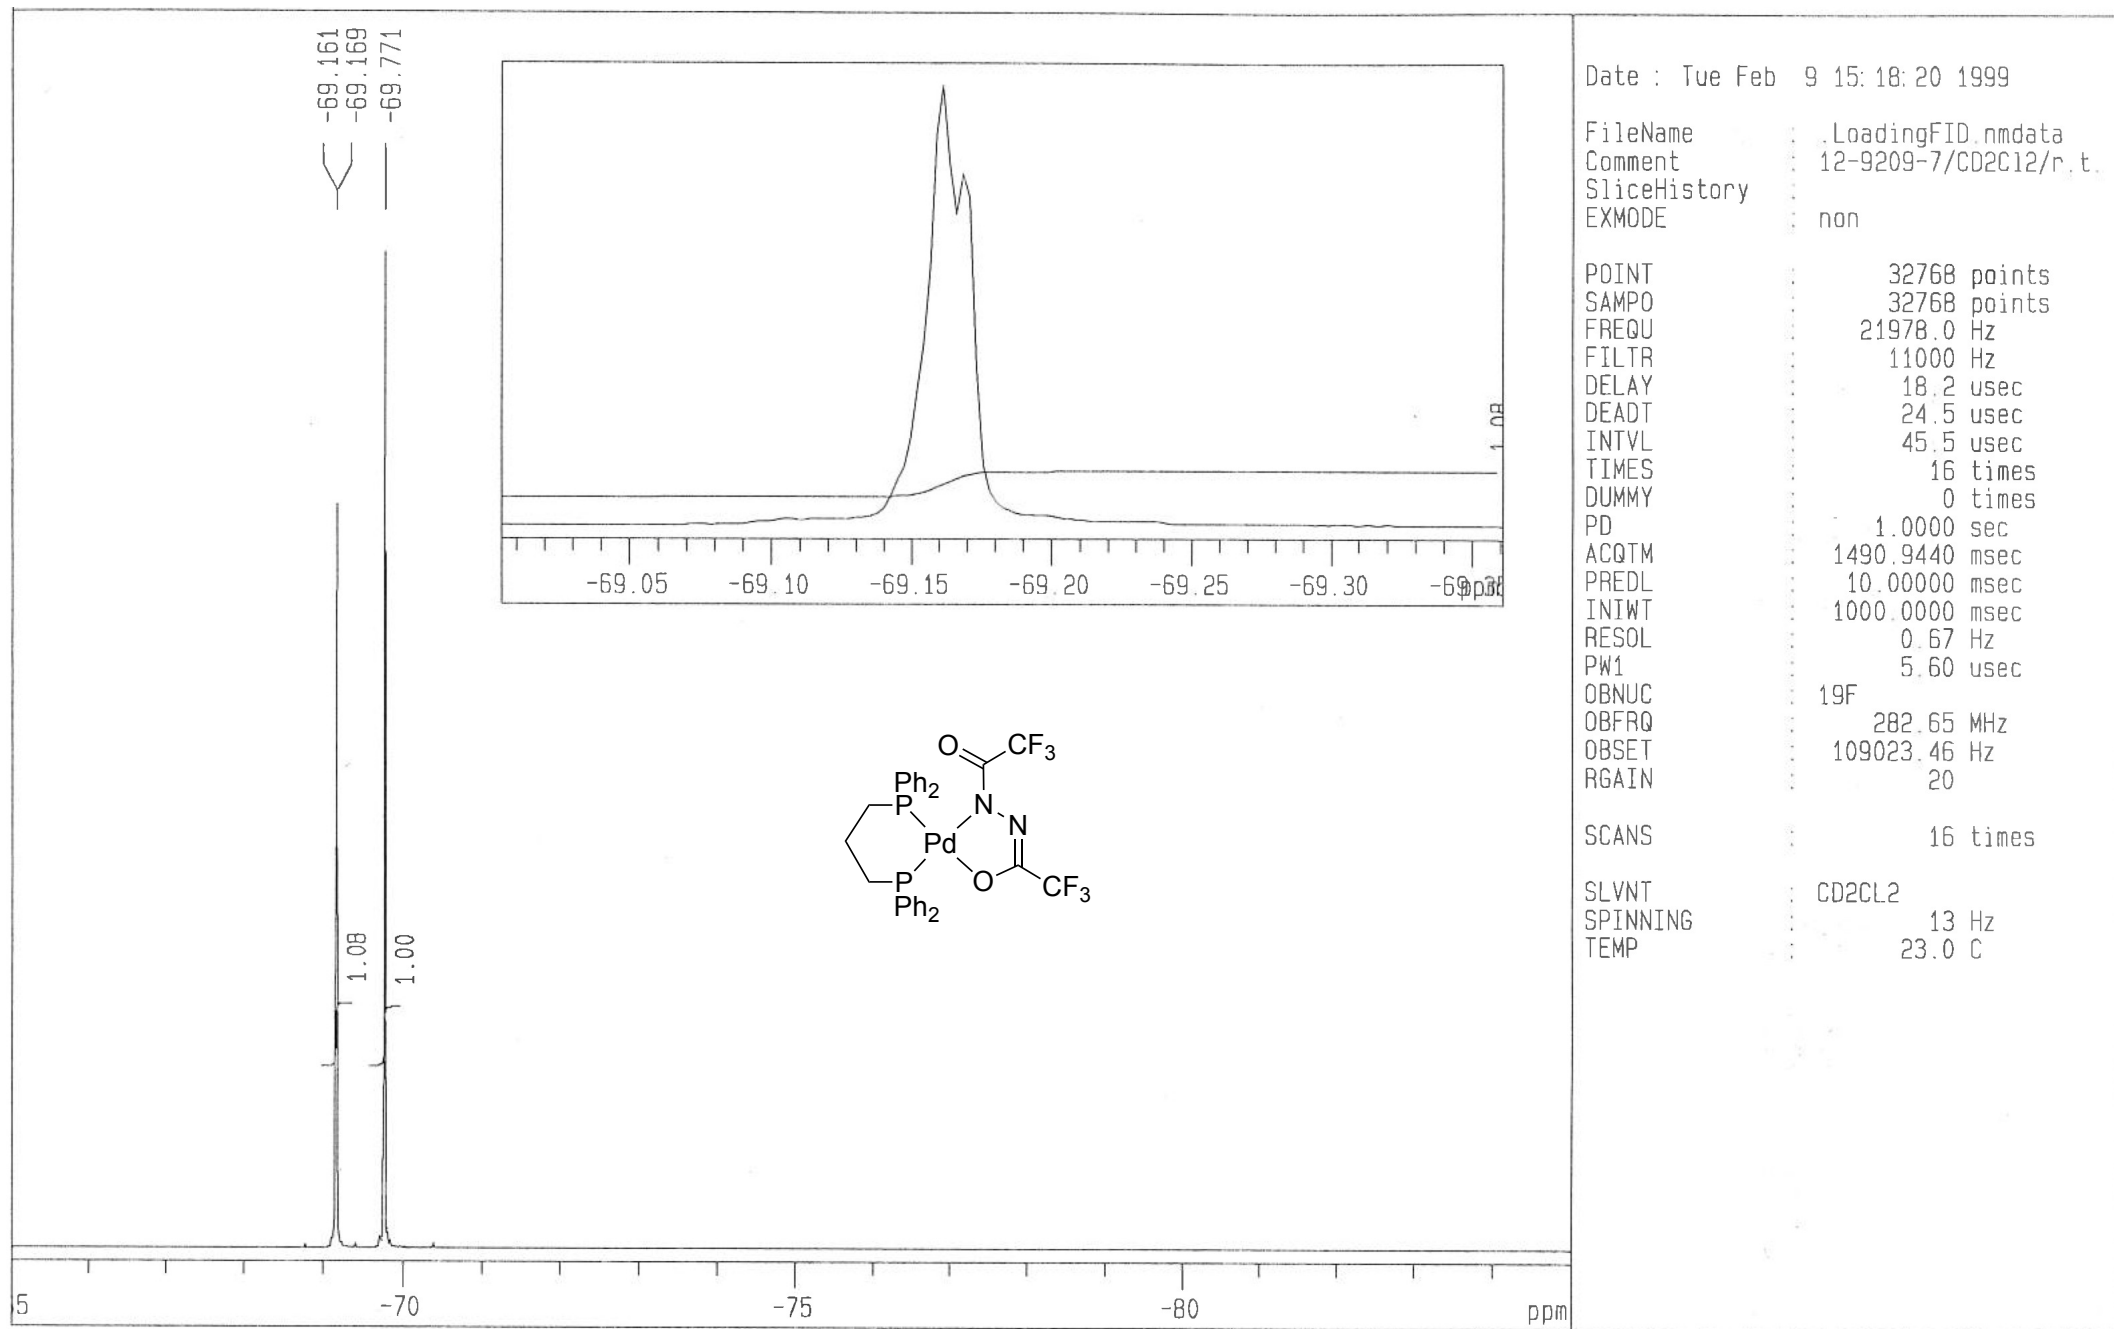

Figure S9. <sup>19</sup>F NMR Spectrum of **2** Prepared from Pd(OAc)<sub>2</sub> (CD<sub>2</sub>Cl<sub>2</sub>, rt)

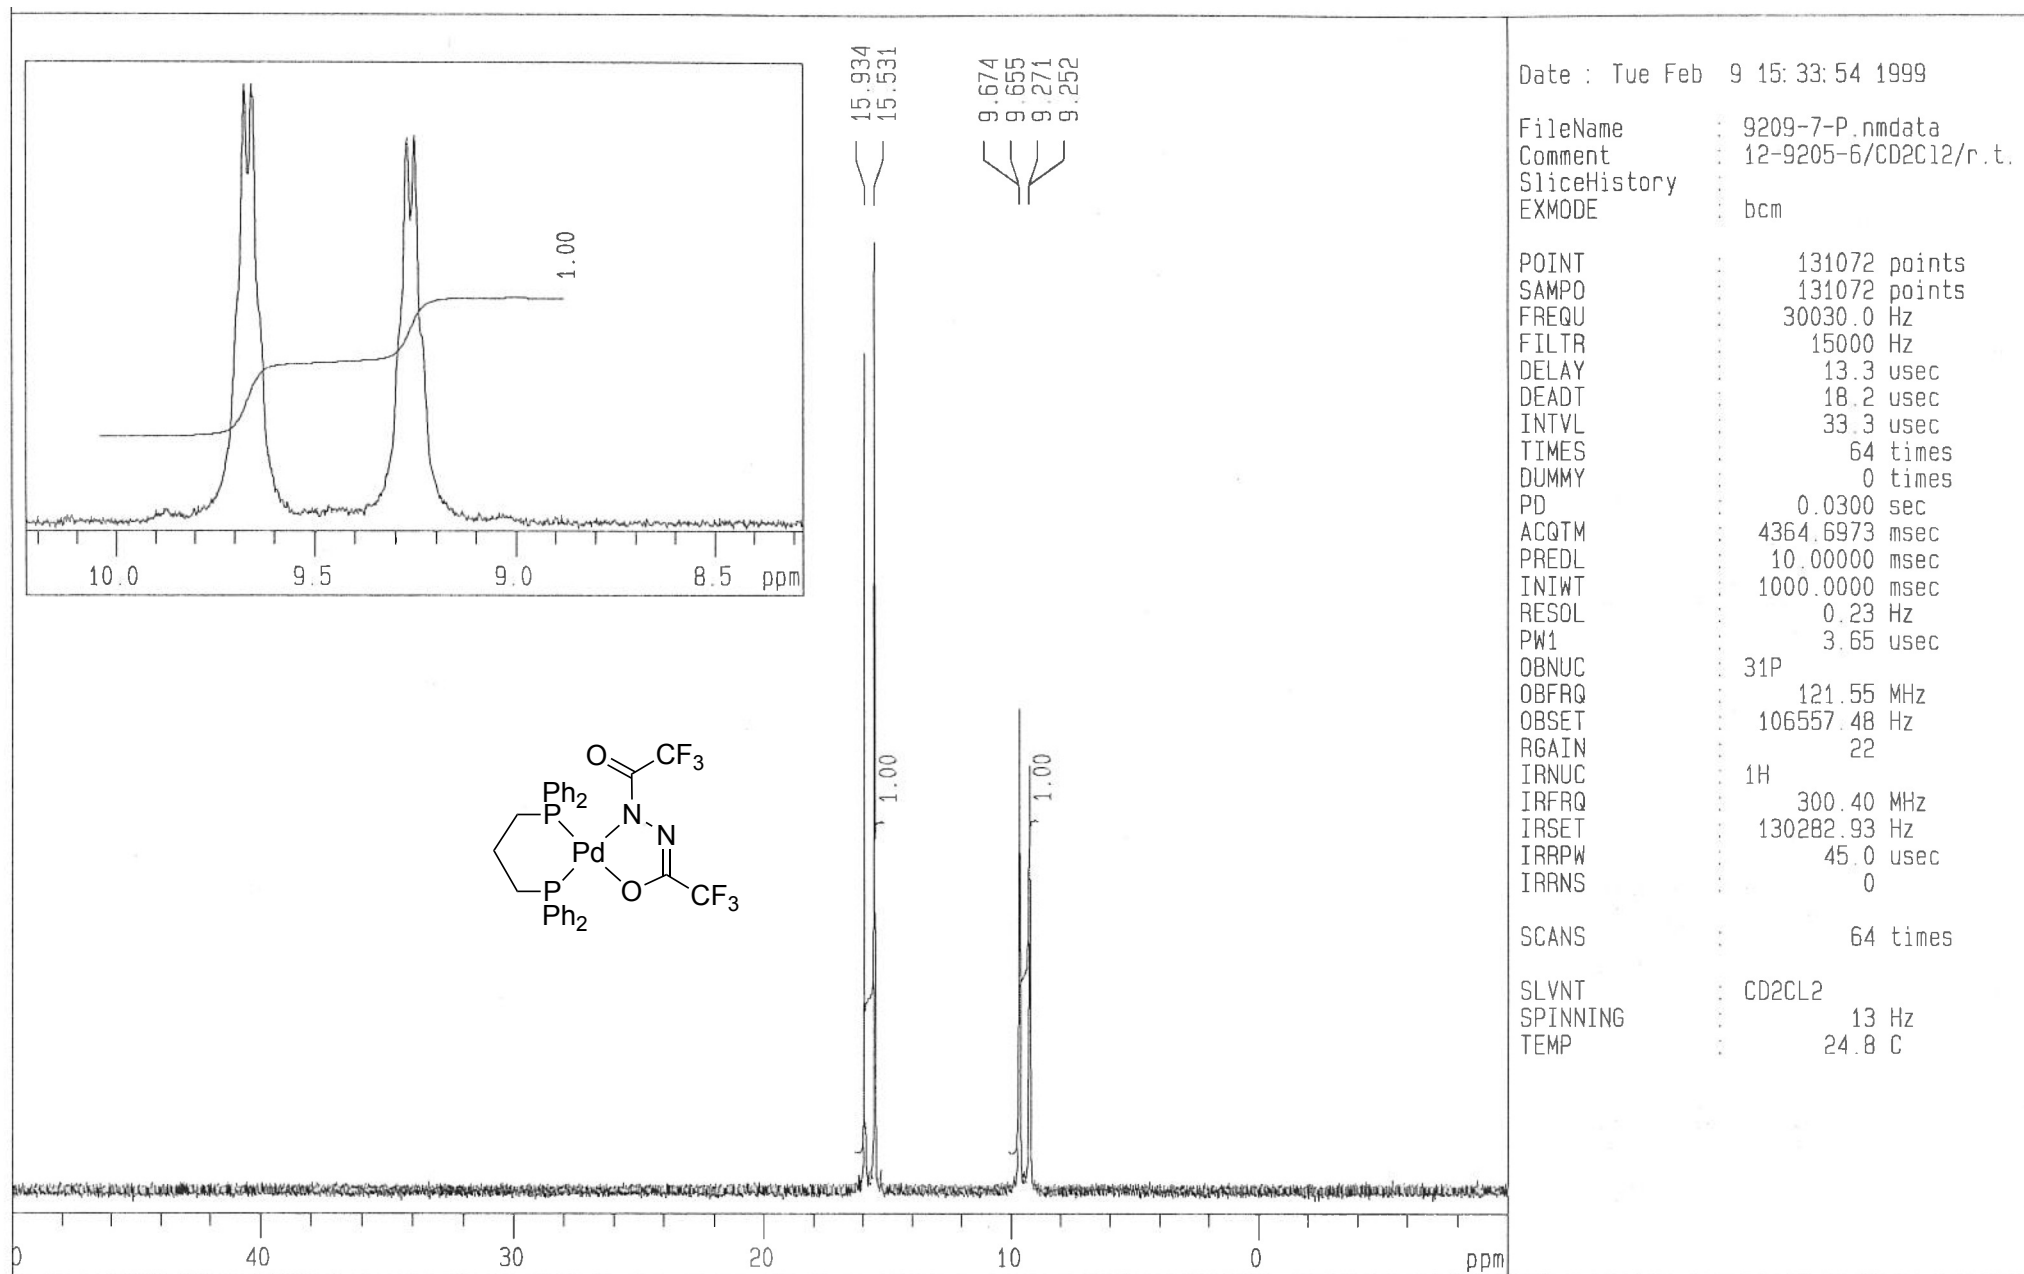

Figure S10.  $^{31}\text{P}\{^1\text{H}\}$  NMR Spectrum of **2** Prepared from  $\text{Pd}(\text{OAc})_2$  ( $\text{CD}_2\text{Cl}_2$ , rt)



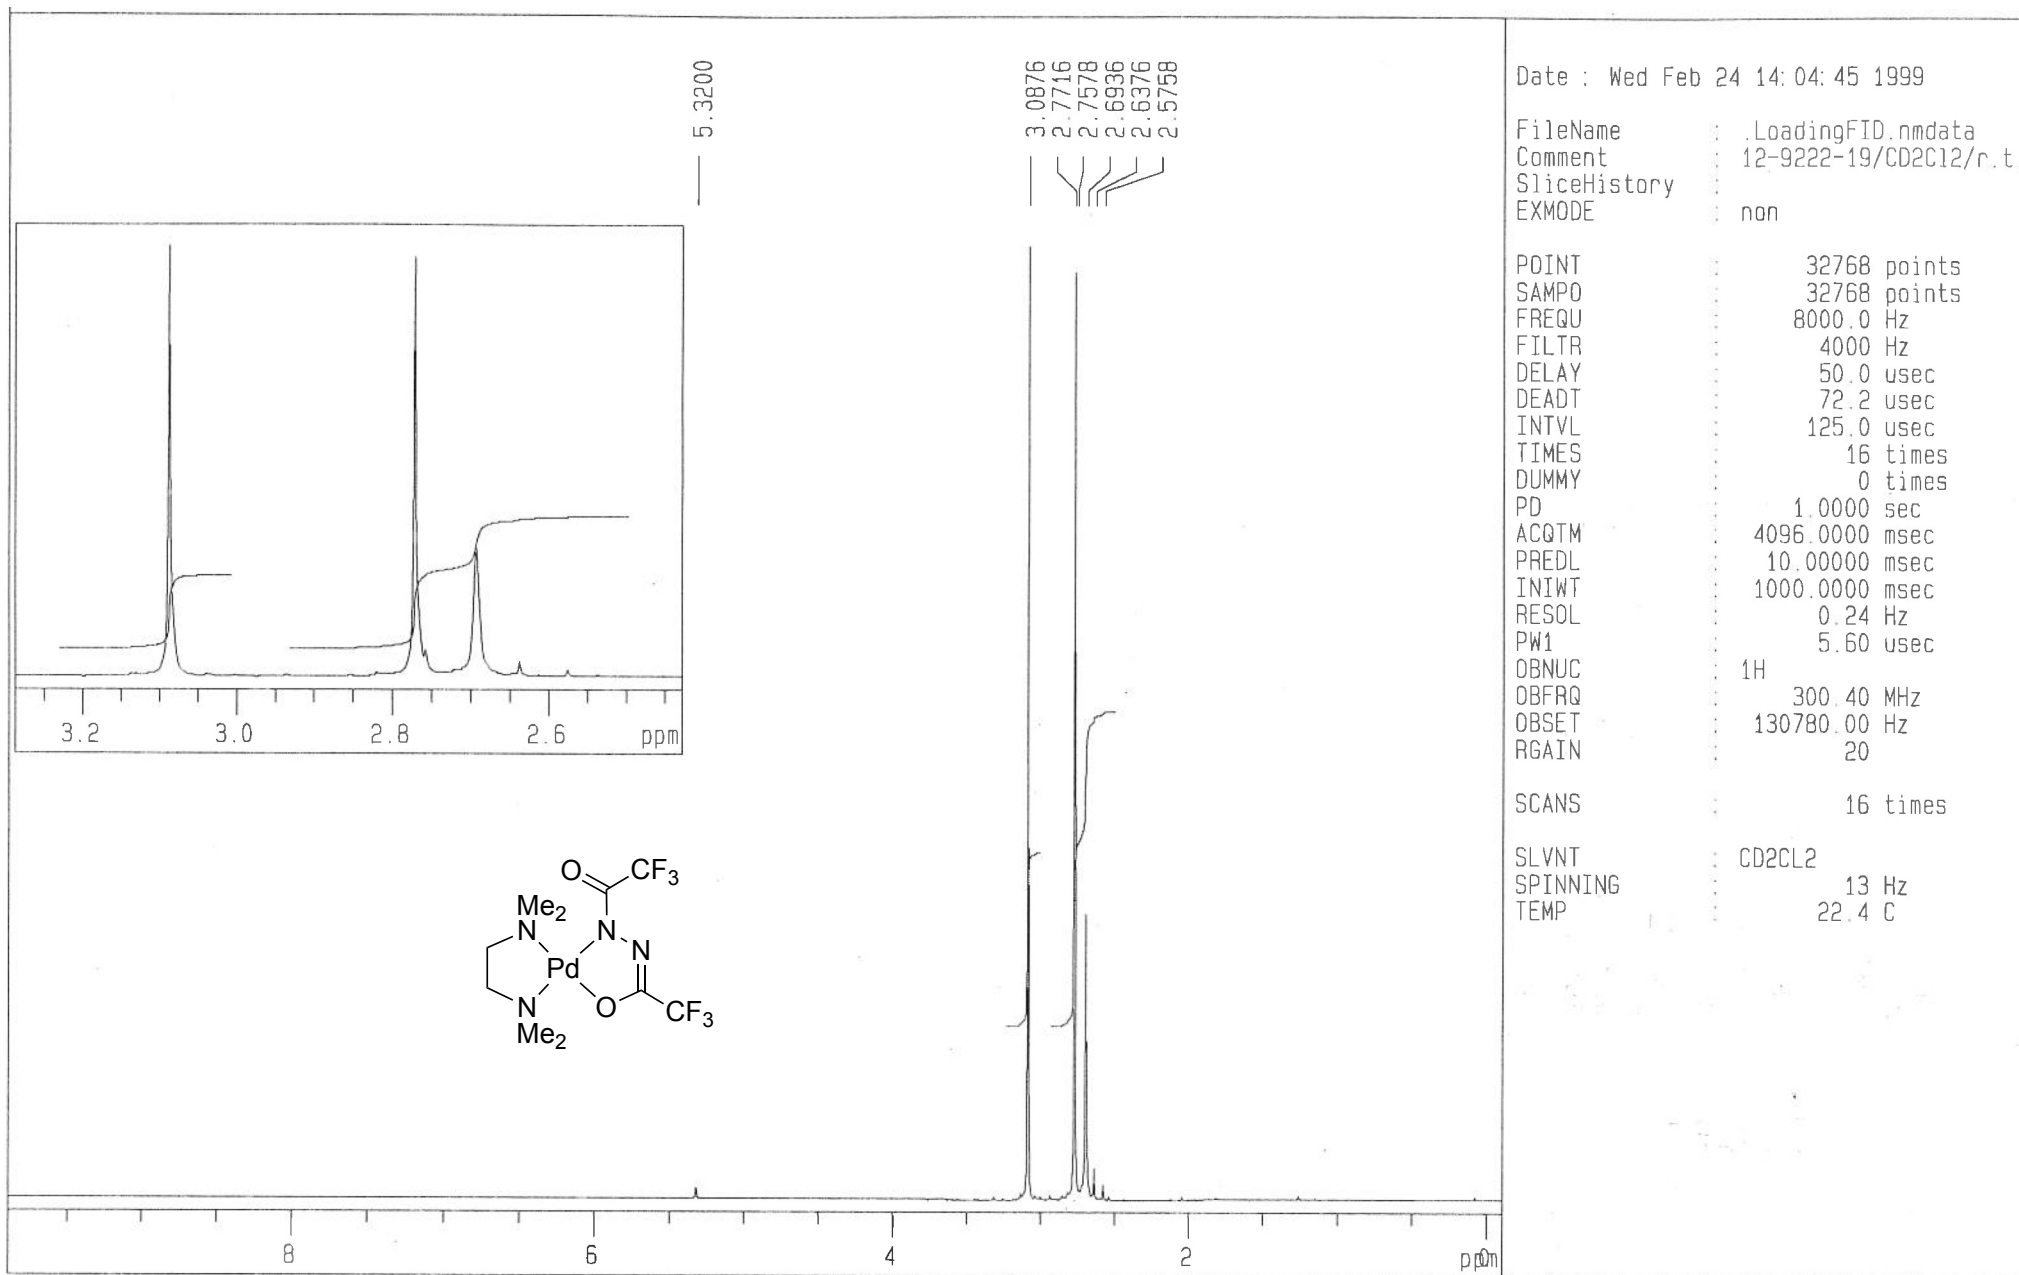

Figure S11. <sup>1</sup>H NMR Spectrum of **3** Prepared from Pd(OAc)<sub>2</sub> (CD<sub>2</sub>Cl<sub>2</sub>, rt)

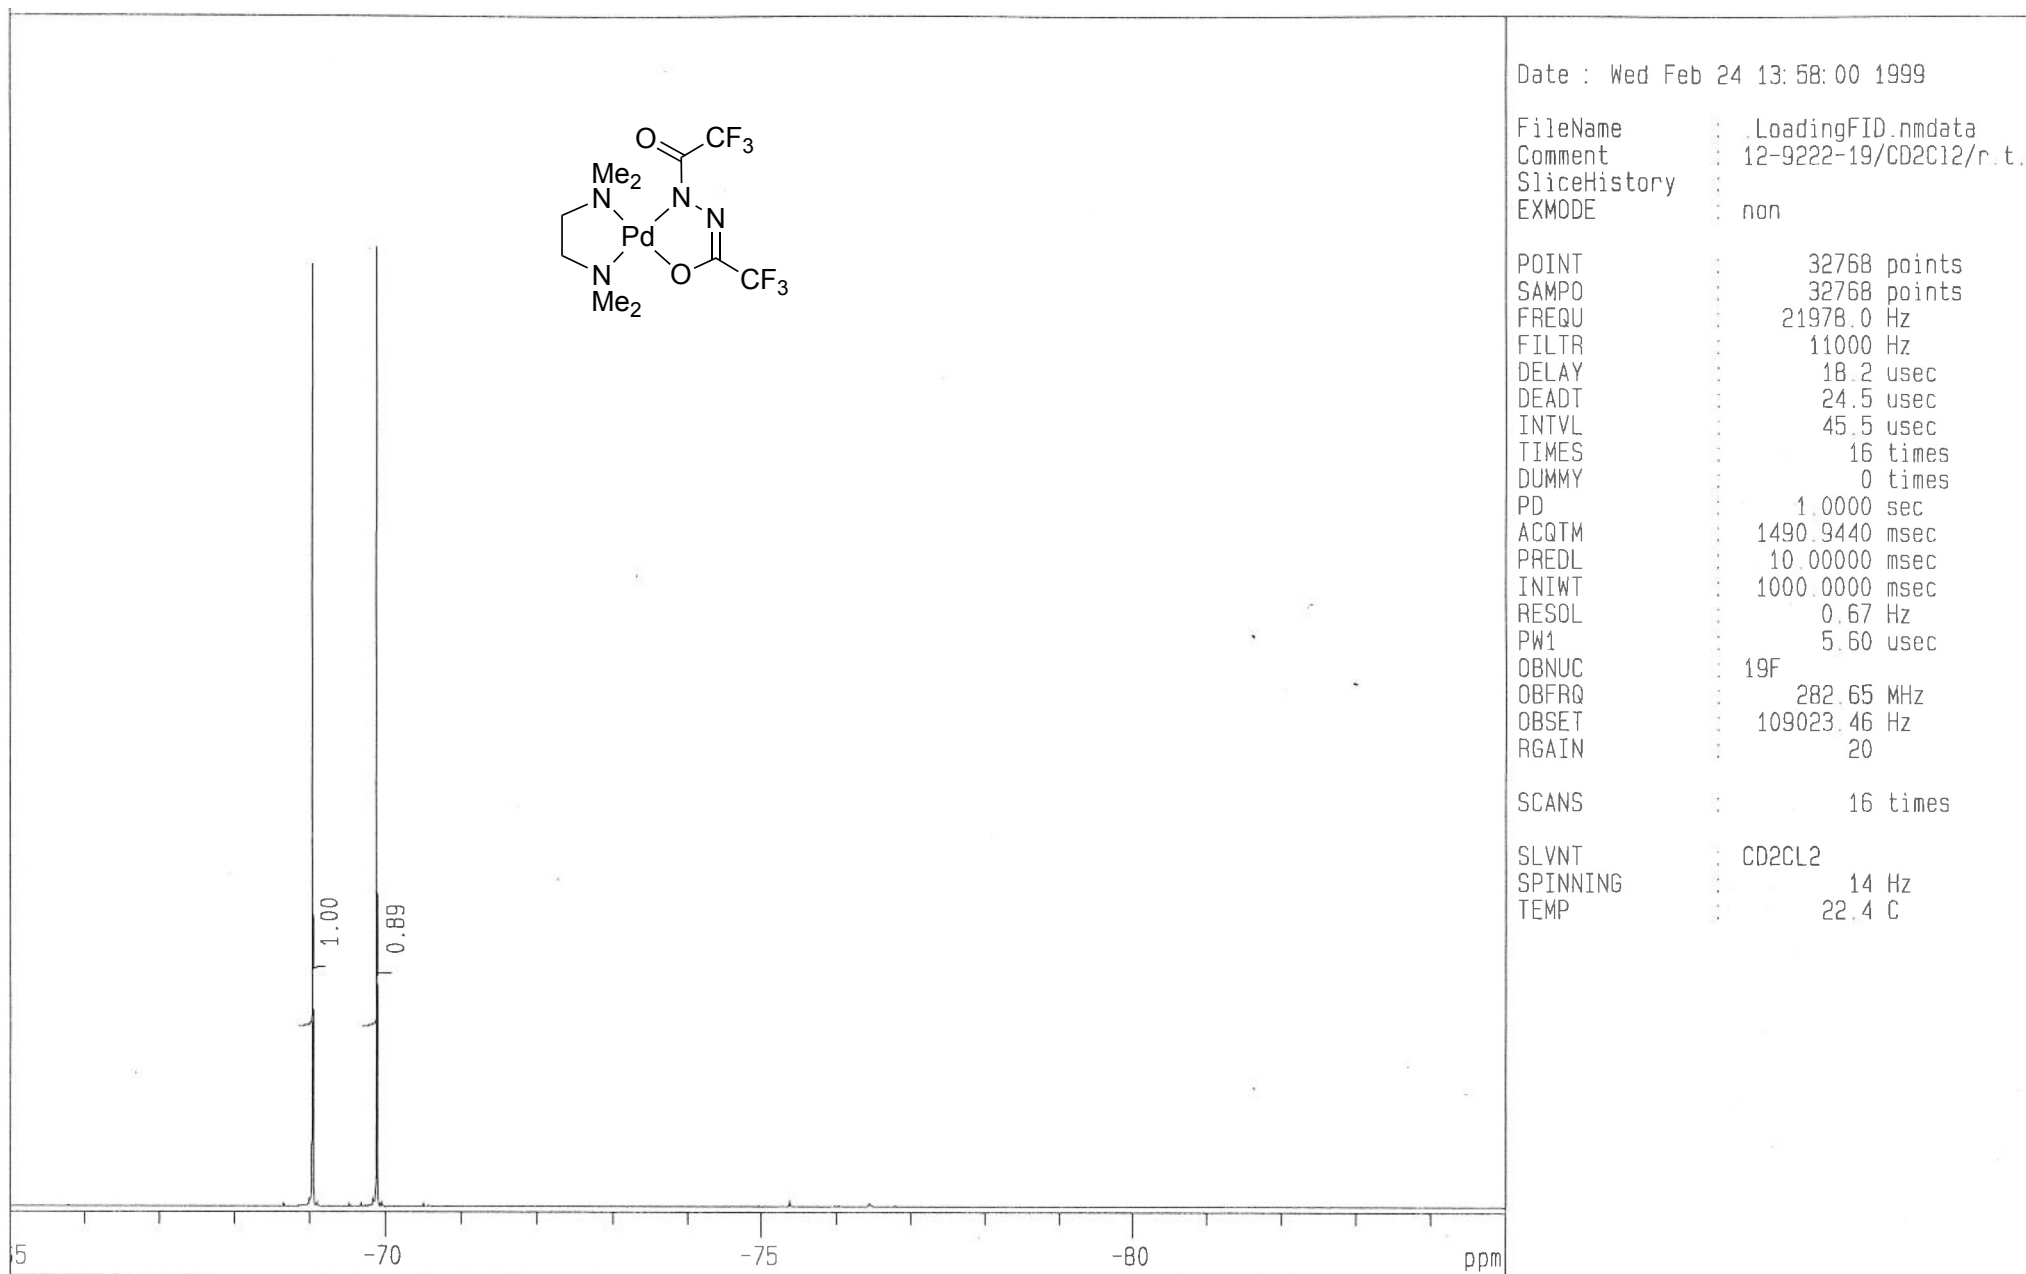

Figure S12. <sup>19</sup>F NMR Spectrum of 3 Prepared from Pd(OAc)<sub>2</sub> (CD<sub>2</sub>Cl<sub>2</sub>, rt)

Solvent: CD<sub>2</sub>Cl<sub>2</sub>

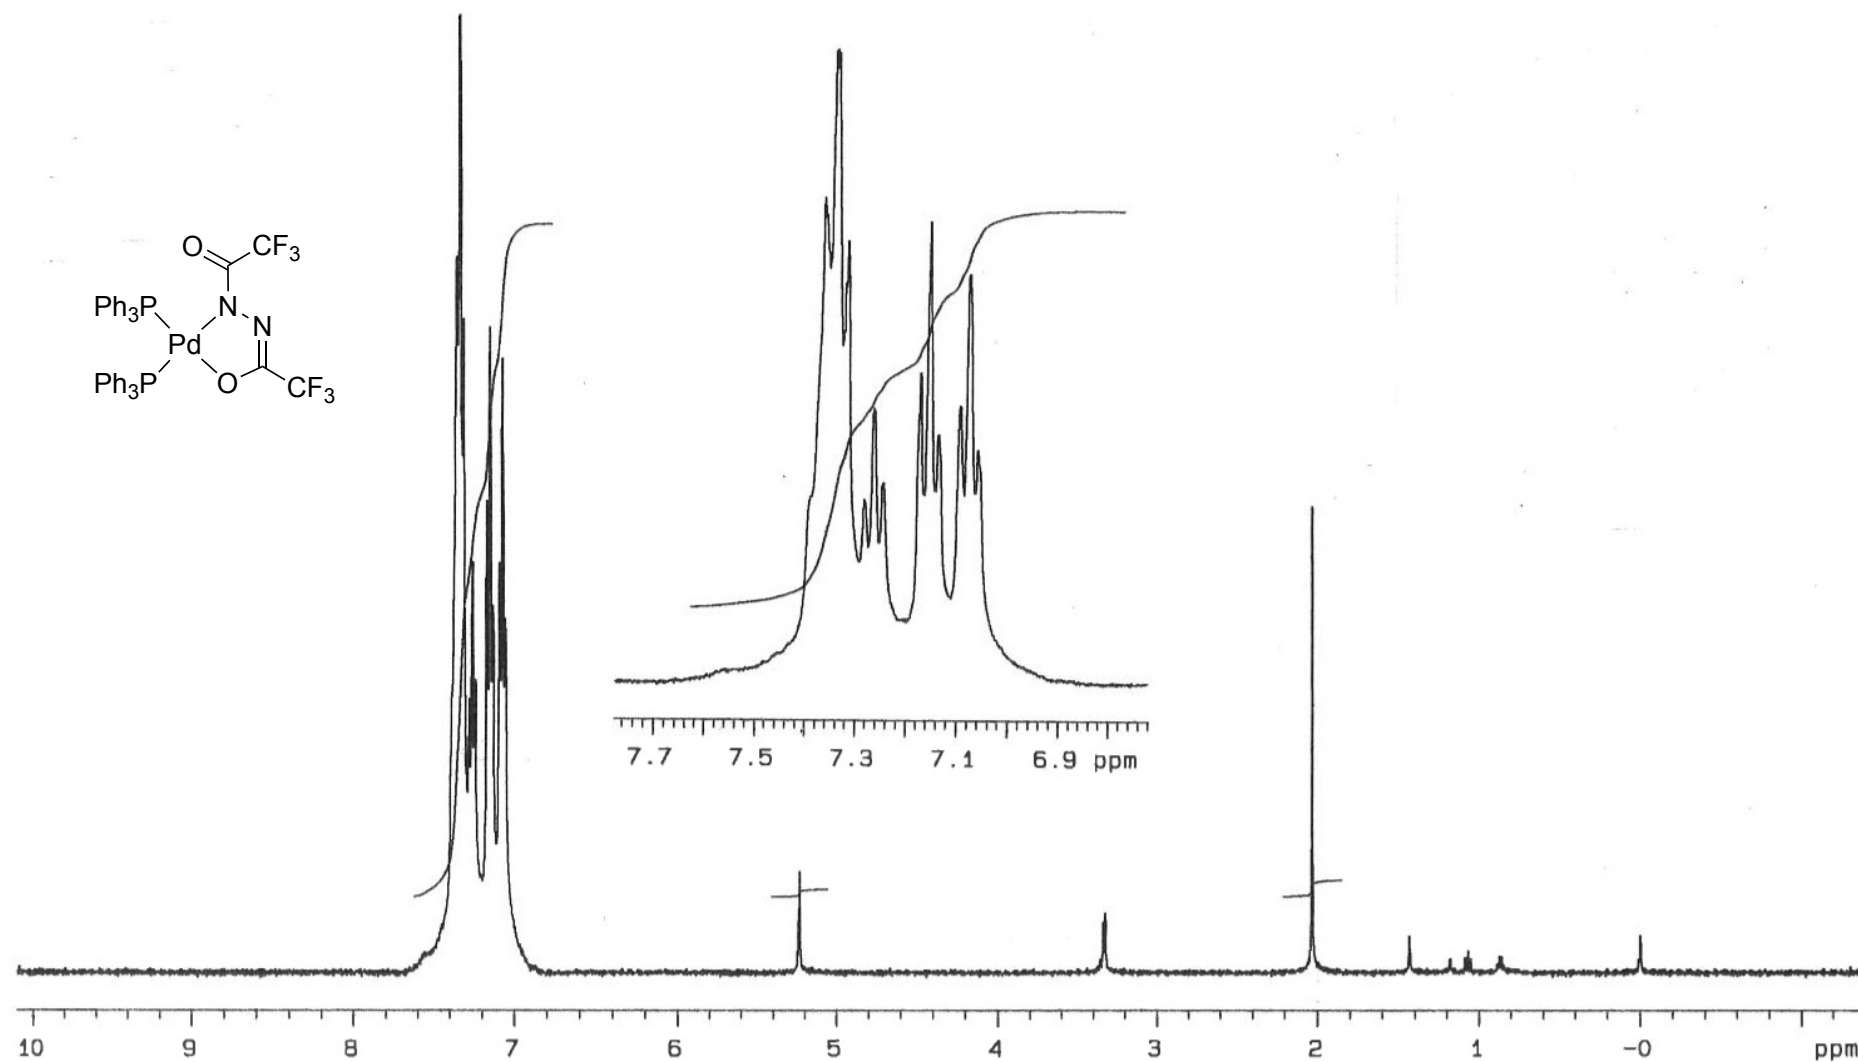

Figure S13. <sup>1</sup>H NMR Spectrum of **4** (CD<sub>2</sub>Cl<sub>2</sub>, rt)

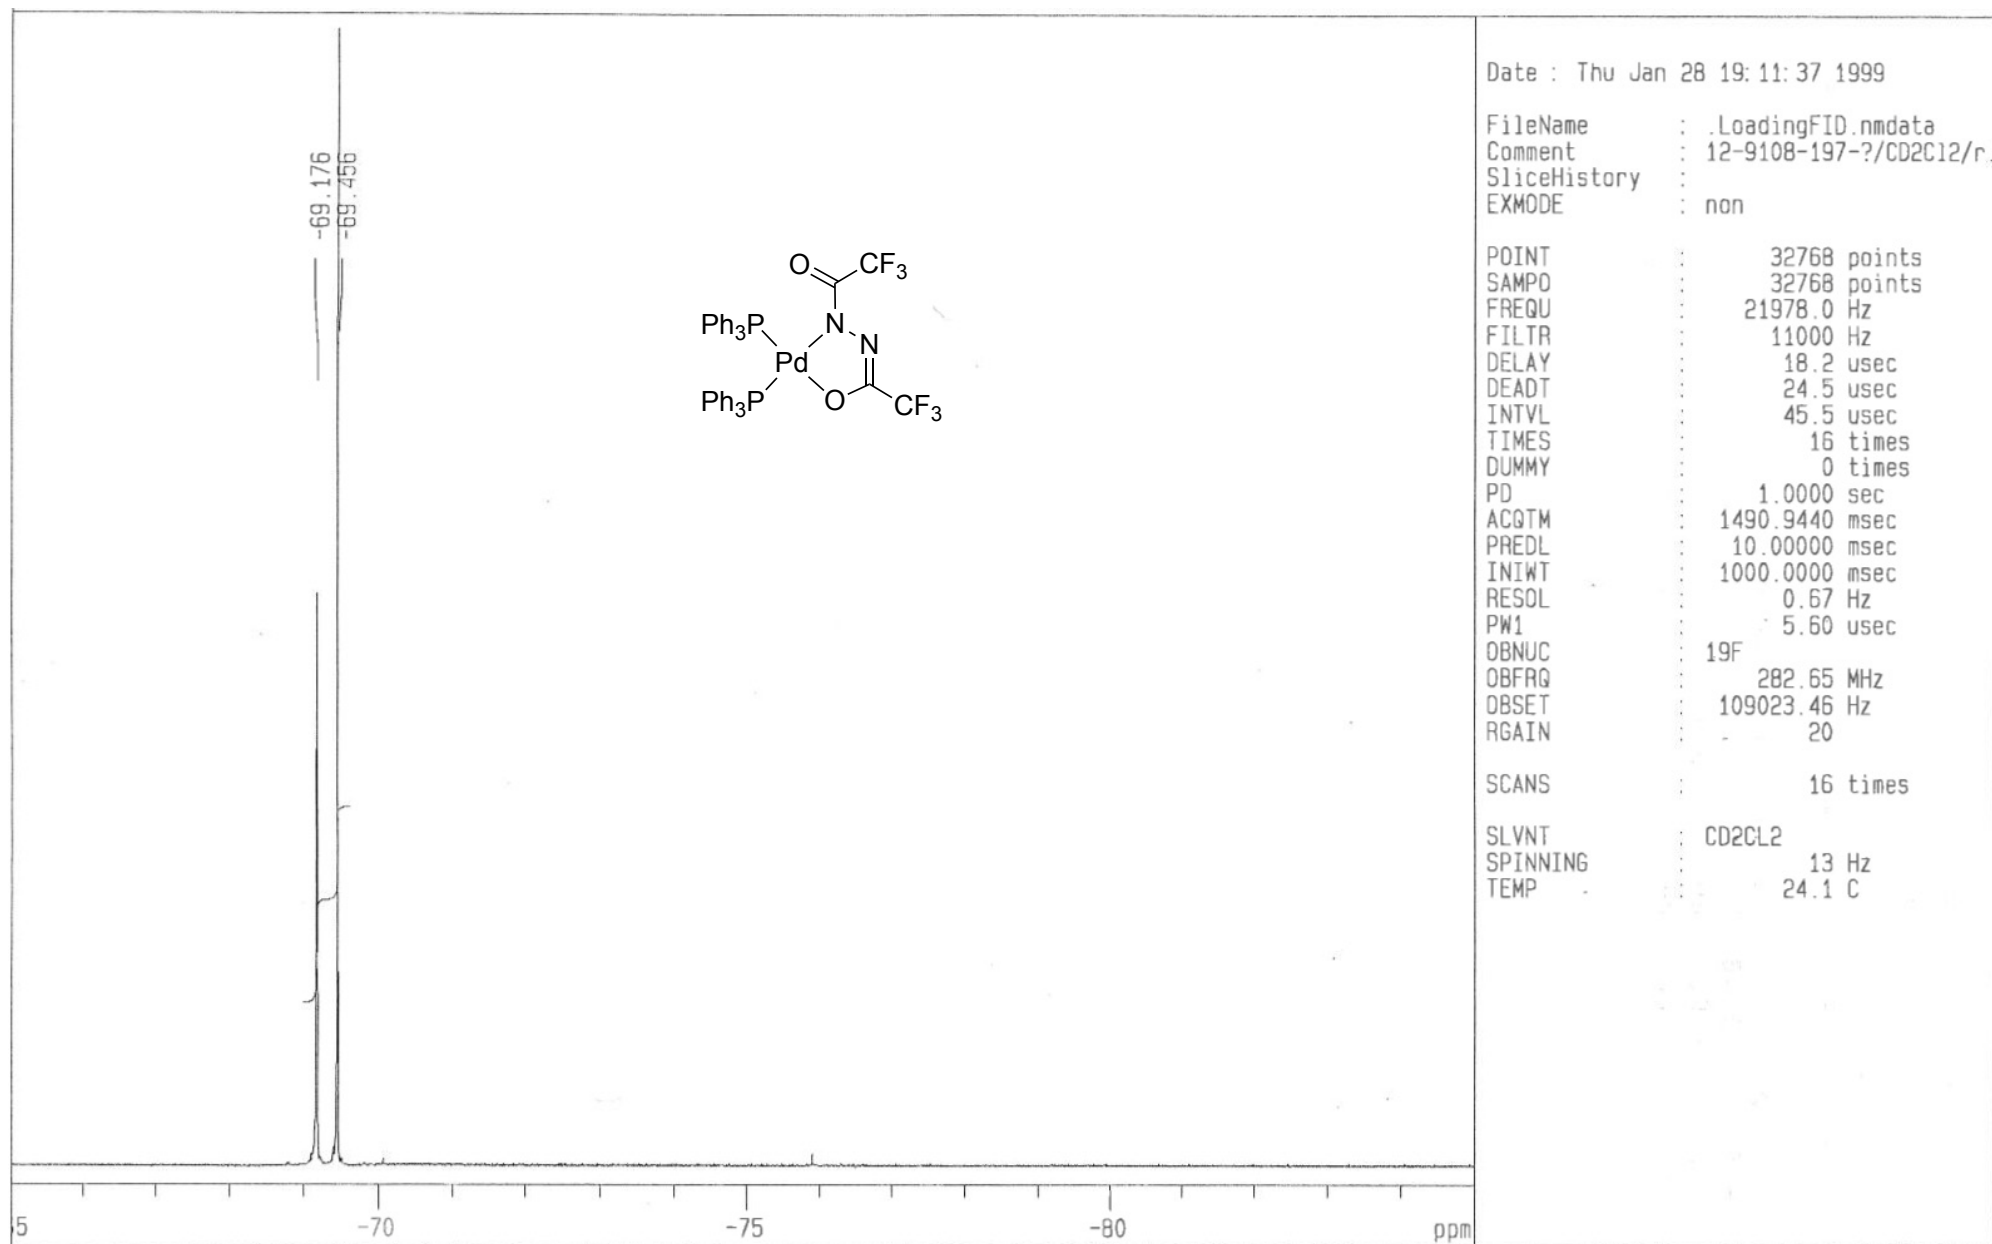

Figure S14. <sup>19</sup>F NMR Spectrum of 4 (CD<sub>2</sub>Cl<sub>2</sub>, rt)

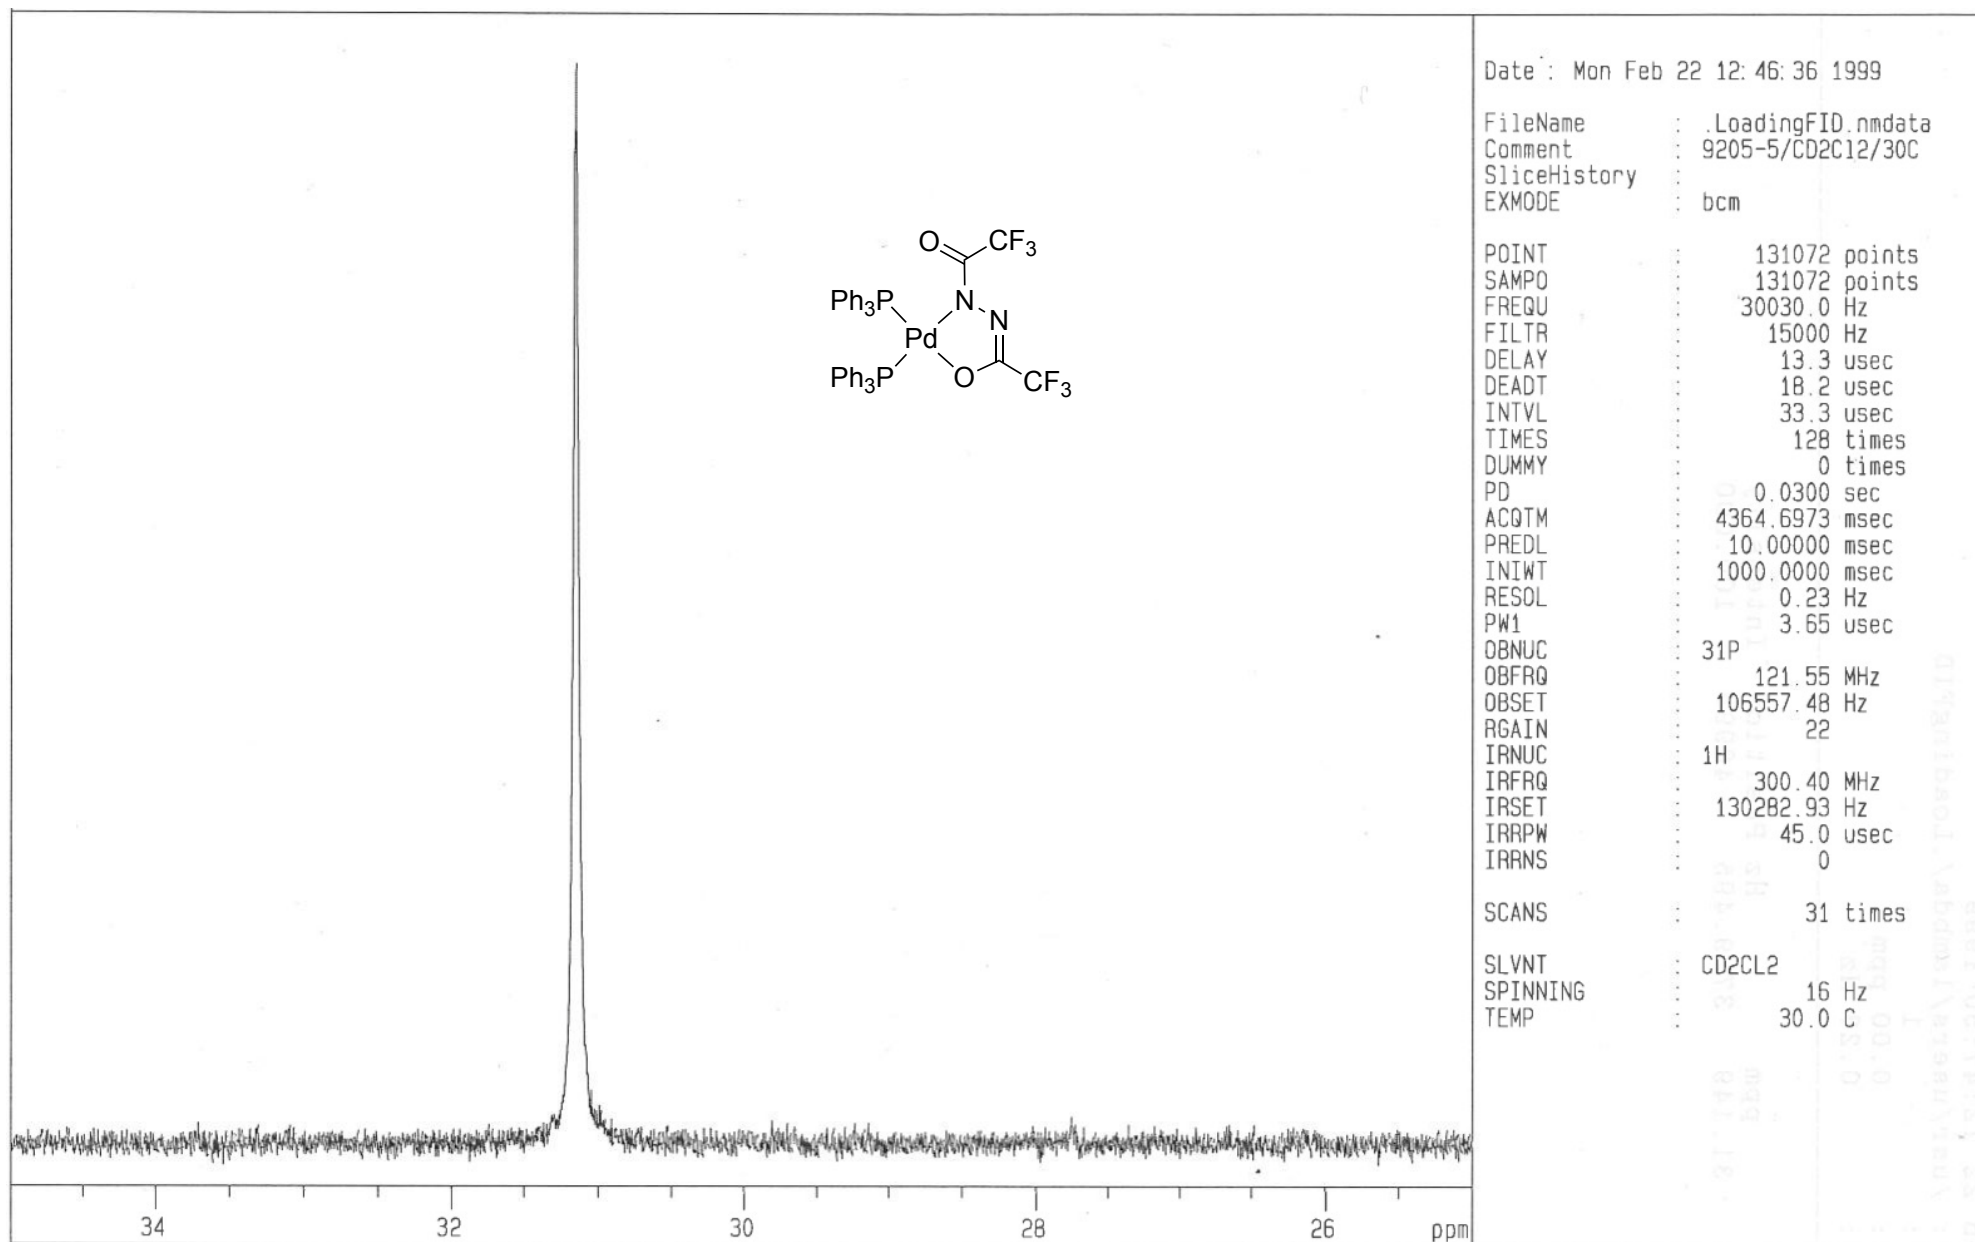

Figure S15.  $^{31}\text{P}\{^1\text{H}\}$  NMR Spectrum of **4** ( $\text{CD}_2\text{Cl}_2$ , rt)
